## 1 **Solvent quality and chromosome folding in *Escherichia coli***

2 Yingjie Xiang<sup>1,2</sup>, Ivan V. Surovtsev<sup>2,3,4</sup>, Yunjie Chang<sup>2,5</sup>, Sander K. Govers<sup>2,3,4,6</sup>, Bradley R. Parry<sup>2,3,4</sup>, Jun  
3 Liu<sup>2,5</sup>, Christine Jacobs-Wagner<sup>2,3,4,5,6,7,\*</sup>

4 <sup>1</sup>Department of Mechanical Engineering and Materials Science, Yale University, New Haven, CT  
5 06520, USA

6 <sup>2</sup>Microbial Sciences Institute, Yale University, West Haven, CT 06516, USA

7 <sup>3</sup>Department of Molecular, Cellular, and Developmental Biology, Yale University, New Haven, CT  
8 06520, USA

9 <sup>4</sup>Howard Hughes Medical Institute, Yale University, New Haven, CT 06520, USA

10 <sup>5</sup>Department of Microbial Pathogenesis, Yale School of Medicine, New Haven, CT 06510, USA

11 <sup>6</sup>Department of Biology and ChEM-H Institute, Stanford University, Palo Alto, CA 94305, USA

12 <sup>7</sup>Lead contact

13 \*Correspondence: [jacobs-wagner@stanford.edu](mailto:jacobs-wagner@stanford.edu)

14

## 15 **Summary**

16 All cells must fold their genomes, including bacterial cells where the chromosome is compacted into  
17 a domain-organized meshwork called nucleoid. Polymer conformation depends highly on the quality  
18 of the solvent. Yet, the solvent quality for the DNA polymer inside cells remains unexplored. Here, we  
19 developed a method to assess this fundamental physicochemical property in live bacteria. By  
20 determining the DNA concentration and apparent average mesh size of the nucleoid, we provide  
21 evidence that the cytoplasm is a poor solvent for the chromosome in *Escherichia coli*. Monte Carlo  
22 simulations showed that such a poor solvent compacts the chromosome and promotes spontaneous  
23 formation of chromosomal domains connected by lower-density DNA regions. Cryo-electron  
24 tomography and fluorescence microscopy revealed that the (poly)ribosome density within the  
25 nucleoid is spatially heterogenous and correlates negatively with DNA density. These findings have  
26 broad implications to our understanding of chromosome folding and intracellular organization.

27

## 28 **Keywords**

29 Chromosome folding, nucleoid, solvent quality, chromosome compaction, domain organization, DNA  
30 mesh size, ribosome localization

31

32

## 33 **Introduction**

34 All cells, regardless of their origin, must package and organize their genome in a small volume. Proper  
35 folding of the chromosomes is critical as it affects many cellular processes, including gene expression,  
36 DNA repair and chromosome segregation. Unlike eukaryotic cells, bacterial cells lack a nuclear  
37 membrane and do not package their DNA content into repeating structural units akin to nucleosomes.  
38 However, they still fold and concentrate their chromosomal material into a dynamic and organized  
39 DNA meshwork known as the nucleoid. In many bacterial species, including *Escherichia coli*, the  
40 nucleoid does not spread throughout the cell; instead, it is found within a portion of the cytoplasmic  
41 space (Figure 1) (Gray et al., 2019; Hobot et al., 1985; Kellenberger et al., 1958; Mason and Powelson,  
42 1956; Piekarski, 1937; Robinow and Kellenberger, 1994). This indicates that the compaction of the  
43 bacterial chromosome is not simply dictated by the physical confinement created by the cell  
44 envelope. Furthermore, the chromosome displays higher-order organization across multiple length  
45 scales (Dame et al., 2020; Verma et al., 2019). For instance, high-resolution chromosome  
46 conformation capture (Hi-C) studies in different bacterial species have demonstrated that the  
47 chromosome is organized into various “chromosomal interaction domains” (CIDs) within which  
48 nearby gene loci interact more frequently with each other than with those outside the domain (Le et  
49 al., 2013; Liroy et al., 2018; Marbouty et al., 2014; Marbouty et al., 2015; Val et al., 2016; Wang et al.,  
50 2017; Wang et al., 2015).

51  
52 Apart from its compacted and organized structure, another important, though less appreciated,  
53 aspect of the nucleoid is its mesh size (Figure 1), as it impacts the mobility of cytoplasmic components  
54 and thereby affects the spatial organization of the cytoplasm. For example, the enrichment of  
55 ribosomes/polyribosomes (mRNAs loaded with multiple ribosomes) at the cell poles and in-between  
56 segregated nucleoids in *E. coli* and other bacteria is often attributed to nucleoid exclusion (Azam et  
57 al., 2000; Bakshi et al., 2012; Gray et al., 2019; Lewis et al., 2000; Robinow and Kellenberger, 1994;  
58 Sanamrad et al., 2014). It is, however, difficult to predict which cytoplasmic components are  
59 impacted by the nucleoid, as its average mesh size has not been measured in any bacteria.

60  
61 What are the biophysical principles that help explain the compacted size, domain organization and  
62 mesh size of the bacterial nucleoid? Multiple factors are thought to be at play (Surovtsev and Jacobs-  
63 Wagner, 2018). They include transcription and other biochemical processes that modulate DNA  
64 supercoiling (Dorman, 2019; Ma and Wang, 2016). Bacteria also carry a number of DNA-binding  
65 proteins, known as nucleoid-associated proteins (NAPs) and structural maintenance of chromosome

66 (SMC) proteins, that alter the structure of the DNA locally or over long molecular distances (Dame et  
67 al., 2020; Dillon and Dorman, 2010). While the direct contribution of these proteins to DNA  
68 compaction is not entirely clear (Spurio et al., 1992; Wu et al., 2019), NAPs and SMC protein  
69 complexes are known to play important roles in the organization and regulation of chromosome  
70 architecture at the level of individual genes and CIDs (Dame et al., 2020). In addition, macromolecular  
71 crowding is frequently proposed to drive chromosome compaction through steric effects (Cunha et  
72 al., 2001; de Vries, 2010; Jeon et al., 2017; Jun, 2015; Odijk, 1998; Pelletier et al., 2012; Shendruk et  
73 al., 2015; Wegner et al., 2016; Wu et al., 2019; Yang et al., 2020; Yoshikawa et al., 2010; Zhang et al.,  
74 2009; Zimmerman, 1993; Zimmerman and Minton, 1993). The idea is that cytoplasmic components  
75 larger than the DNA mesh size (i.e., crowders) will be excluded from the nucleoid, creating an  
76 imbalance in component concentration between the nucleoid region and the rest of the cytoplasm.  
77 This imbalance results in an effective osmotic pressure that pushes DNA segments closer to each  
78 other. The magnitude of compaction driven by this steric repulsion is currently unknown inside cells.  
79

80 It is important to note that the DNA and the cytoplasmic components do not interact only sterically,  
81 as neither of them are chemically inert. From a simple polymer physics perspective, the cytoplasm  
82 can be viewed as a polymer solution: the polymer is the DNA, and the solvent is everything else in the  
83 cytoplasm (water, metabolites, proteins, RNAs, etc.) (Figure 1). It is well established that the  
84 interaction between a polymer and its solvent directly affects the three-dimensional (3D)  
85 conformation of the polymer (Gennes, 1979; Rubinstein, 2003). Based on the polymer-solvent  
86 interaction, the quality of a solvent is broadly classified into three types: good, ideal and poor. In a  
87 good solvent, interactions between the polymer and the solvent are favored over interactions  
88 between polymer segments. Conversely, in a poor solvent, interactions between polymer segments  
89 are favored over their interactions with the solvent. When the repulsive and attractive interactions  
90 are balanced out (zero net interaction), the solvent is said to be ideal. Despite the well-known  
91 importance of the solvent for the polymer conformation, the effects of the solvent quality of the  
92 bacterial cytoplasm (or the eukaryotic nucleoplasm) on DNA compaction or organization are unclear.  
93 This is presumably because the solvent quality of the cytoplasm (or nucleoplasm) has not been  
94 measured and is difficult to predict. Traditional methods for determining the solvent quality of a  
95 polymer solution, such as dynamic light scattering, small-angle X-ray scattering, rheology, nuclear  
96 and magnetic resonance (Auge et al., 2009; Guettari et al., 2012; Waigh et al., 2001), are unfortunately  
97 not suitable for measurements inside cells. In this study, we develop an experimental approach to  
98 estimate the solvent quality of the cytoplasm in *E. coli* cells. Our results show that the cytoplasm is a

99 poor solvent for the chromosome and that this macroscopic characteristic of the cytoplasm  
100 contributes to chromosome folding and intracellular organization.

101

## 102 **Results**

103 As the polymer concentration increases, the polymer solution transitions from the regime of being  
104 dilute to semidilute, where the polymer segments overlap to form a meshwork. It is well established  
105 in polymer physics that the average mesh size (or correlation length)  $\xi$  of a semidilute polymer  
106 solution depends not only on properties of the polymer (concentration, rigidity, molecular weight  
107 and monomer size), but also on the quality of the solvent (Gennes, 1979; Rubinstein, 2003), as shown  
108 in Eq. 1 (see STAR Methods for derivation).

$$109 \quad \xi = \frac{\sqrt{3}}{6} b^{\frac{\nu-1}{3\nu-1}} \left( \frac{18\sqrt{3}M_w}{\pi c N_A l_{bp}} \right)^{\frac{\nu}{3\nu-1}} \quad (1)$$

110 In this equation, the term  $c$  represents the average concentration of the polymer. The Flory exponent  
111  $\nu$  quantifies the solvent quality. It is equal to 0.5 for an ideal solvent, and is smaller than 0.5 for a poor  
112 solvent and greater than 0.5 for a good solvent (Rubinstein, 2003).  $N_A$  is Avogadro's number.  $M_w$  and  
113  $l_{bp}$  are the average molecular weight (650 g/mol) and size of a base pair (0.34 nm), respectively  
114 (Diekmann et al., 1982; Lee et al., 2012; Peale et al., 1989; Ratilainen et al., 2001; Yonemura and  
115 Maeda, 1982). The remaining term,  $b$ , is the Kuhn length of the polymer, which is a measure of its  
116 rigidity and equals to twice the persistence length of the polymer. DNA is a semiflexible polymer. Its  
117 rigidity stems from base stacking interactions within the DNA duplex and electrostatic repulsion  
118 among phosphate groups in the DNA backbone. The persistence length of the DNA is often assumed  
119 to be 50 nm (i.e., Kuhn length  $b = 100$  nm). However, in vitro measurements of DNA rigidity indicate  
120 that the presence of multivalent cations, including  $Mg^{2+}$ , the most abundant divalent cation in *E. coli*  
121 (Alatossava et al., 1985; Cayley et al., 1991; Kuhn and Kellenberger, 1985; Lusk et al., 1968; Moncany  
122 and Kellenberger, 1981), can decrease the DNA persistence length down to 25-35 nm (Baumann et  
123 al., 1997; Mantelli et al., 2011; Porschke, 1986; Porschke, 1991). Based on these measurements and  
124 the millimolar concentration of  $Mg^{2+}$  in the *E. coli* cytoplasm (Alatossava et al., 1985; Cayley et al.,  
125 1991; Lusk et al., 1968), the Kuhn length of the chromosomal DNA ( $b$ ) is estimated to be  $\sim 60$  nm (i.e.,  
126 a persistence length of  $\sim 30$  nm).

127

128 Given the aforementioned values for  $b$ ,  $M_w$  and  $l_{bp}$ , the solvent quality of the cytoplasm can be  
129 deduced using Eq. 1 by determining the concentration of the chromosomal DNA within the nucleoid  
130 region ( $c$ ) and the average mesh size of the nucleoid ( $\xi$ ).

131

## 132 **Average DNA concentration within the nucleoid**

133 To determine the average concentration of DNA within the nucleoid, we took advantage that in  
134 nutrient-poor environments (e.g., glycerol as a carbon source), *E. coli* cells exhibit discrete B, C and D  
135 periods, corresponding to the cell cycle phases before, during and after DNA replication, respectively  
136 (Cooper and Helmstetter, 1968). In B-period cells, the DNA mass can be unambiguously determined,  
137 as each nucleoid in these cells consists of a single, non-replicating chromosome (Cooper and  
138 Helmstetter, 1968). Using a previously described method (Gray et al., 2019), we identified B-period  
139 cells within a population by examining cell size and the spatial pattern of the DNA replication marker  
140 SeqA fused to mCherry. During DNA replication (C period), SeqA binds the newly synthesized hemi-  
141 methylated DNA (Brendler et al., 1995; Lu et al., 1994; Slater et al., 1995; Waldminghaus et al., 2012).  
142 This property leads to the formation of fluorescent foci in cells actively replicating DNA (Figure 2A),  
143 as shown before (Adiciptaningrum et al., 2015; Gray et al., 2019; Helgesen et al., 2015; Molina and  
144 Skarstad, 2004; Wallden et al., 2016). In contrast, SeqA-mCherry displayed a diffuse distribution in  
145 cells before and after DNA replication (i.e., during B and D periods, respectively) (Figure 2A). We used  
146 these changes in spatial distribution of SeqA-mCherry signal and the knowledge that cells grow in  
147 size during the cell cycle to classify cells by cell-cycle period (Figure 2B). Next, we identified the  
148 contour of DAPI-stained nucleoids in 19,510 cells in the B period using the objectDetection module  
149 of the Oufiti software package (Paintdakhi et al., 2016) and quantified their volumes (STAR Methods).  
150 We found that nucleoids consisting of one chromosome have an average volume of  $\sim 0.7 \mu\text{m}^3$  (Figure  
151 2C). The mass of the *E. coli* chromosome is about  $5 \times 10^{-12}$  mg given that this chromosome is made of  
152  $\sim 4.6 \times 10^6$  base pairs and that the average molecular weight of a base pair is 650 g/mol (Lee et al.,  
153 2012; Peale et al., 1989; Ratilainen et al., 2001). From this, we determined the average DNA  
154 concentration within the nucleoid region to be  $7.1 \pm 1.0$  mg/ml (Figure 2D). Our measurements,  
155 which were done with cells growing at 37°C, were robust to a change in growth temperature to 30°C  
156 (Figure S1).

157

158 Under nutrient-rich (fast growth) conditions, *E. coli* cells enlarge to accommodate multi-fork DNA  
159 replication. The absence of a discrete B period under these conditions, prevented us from performing  
160 the same microscopy analyses as above. However, when we converted bulk measurements of DNA  
161 mass per cell made under nutrient-rich growth conditions (Basan et al., 2015) to DNA concentrations  
162 within the nucleoid volume ( $c$ ) by taking into consideration of changes in cell and nucleoid volume,  
163 we obtained  $c = 7.4 \pm 0.2$  mg/ml ( $n = 3$  nutrient-rich growth conditions, see STAR Methods for

164 details). The agreement between this estimation and our single-cell measurements (Figure 2D)  
165 indicates that  $c$  remains largely constant across nutrient-poor and -rich conditions. This is consistent  
166 with both DNA content per cell and nucleoid size scaling with cell size across growth conditions  
167 (Basan et al., 2015; Gray et al., 2019; Sharpe et al., 1998).

168

### 169 **Apparent average nucleoid mesh size in *E. coli* cells**

170 Given  $c \approx 7$  mg/ml, apart from the Flory exponent ( $\nu$ ), the remaining unknown in Eq. 1 is the mesh  
171 size ( $\xi$ ). Studies on biopolymer solutions and hydrogels have demonstrated that particles of size  
172 much smaller than the average mesh size diffuse freely through the meshwork (Axpe et al., 2019; Cai  
173 et al., 2011; Carn et al., 2012; Wong et al., 2004). When the probe size is close to the average mesh  
174 size, the dynamics of the probes becomes impacted by the polymer mesh. This impact exacerbates as  
175 the probes increase in size. In the context of the bacterial cell, this implies that probes much smaller  
176 than the nucleoid mesh size will diffuse freely in the cytoplasm without any apparent hindrance from  
177 the nucleoid (assuming that the particles do not interact with the nucleoid). Such probes will have an  
178 equal probability of diffusing inside or outside the nucleoid. In contrast, probes larger than the  
179 average mesh size will have a higher probability of diffusing outside the nucleoid, i.e., nucleoid  
180 exclusion will increase with increasing probe size.

181

182 If we assume that the cytoplasm is an ideal solvent ( $\nu = 0.5$ ) for the chromosome, the average mesh  
183 size should be 22 nm (Eq. 1), in which case particles larger than 22 nm should have their motion and  
184 spatial distribution affected by the nucleoid. To test this assumption experimentally, we used an *E.*  
185 *coli* strain (CJW6340) that expresses a GFP-tagged, artificially designed protein that self-assembles  
186 into a 60-subunit dodecahedron nanocage of 25 nm in diameter (Figure 3A) (Hsia et al., 2016). These  
187 nanocages were originally designed for drug and vaccine delivery applications. However, because of  
188 their synthetic nature, they are foreign to the bacterial cytoplasm and therefore unlikely to form  
189 specific interactions with the nucleoid or other cytoplasmic components, allowing us to repurpose  
190 them as intracellular tracers.

191

192 Basal expression of nanocage-GFP proteins (i.e., leaky synthesis) was sufficient to produce a single  
193 nanocage-GFP particle per cell in a fraction of the population (Figure 3B). Single-particle tracking  
194 experiments revealed no evidence of steric hindrance by the nucleoid, as the nanocage-GFP particle  
195 appeared to diffuse freely throughout the cytoplasm (Figure 3C; Video S1). This was further  
196 supported by calculating the ensemble-averaged mean squared displacement (MSD) based on all

197 particle trajectories measured ( $n = 85$ ). At the short time scale (first three points), the MSD varied  
198 linearly with the time delay, as the slope of MSD curve in the log-log scale was close to 1 (Figure 3D).  
199 This indicates that the diffusion of nanocage-GFP particles was Brownian (at the long time scale, the  
200 MSD deviated from the linearity due to cell confinement). Furthermore, ensemble calculation of the  
201 relative positions of nanocage-GFP particles inside cells demonstrated that the probability density of  
202 nanocage-GFP localization is uniform throughout the cytoplasm ( $n = 2,500$  localizations) (Figure 3E).  
203 Thus, these 25-nm probes were neither trapped nor excluded by the nucleoid, consistent with their  
204 diffusion being Brownian. This result indicates that the nucleoid mesh size is greater than 25 nm,  
205 which is inconsistent with the bacterial cytoplasm being an ideal solvent for the chromosome.

206  
207 To estimate the average nucleoid mesh size, we used GFP- $\mu$ NS particles, which are larger probes than  
208 our laboratory previously developed to probe the material properties of the cytoplasm (Parry et al.,  
209 2014). GFP- $\mu$ NS is a fluorescent protein fusion to a mammalian reovirus protein that self-assembles  
210 into a globular complex (Broering et al., 2005; Broering et al., 2002). Like GFP and the nanocage  
211 protein,  $\mu$ NS is not of bacterial origin and is therefore unlikely to display a significant affinity to  
212 components of the *E. coli* cytoplasm. When expressed from the chromosome of *E. coli* (CJW4617)  
213 following IPTG induction (50-200  $\mu$ M) for 30 to 120 min (STAR Methods), GFP- $\mu$ NS assembled into  
214 fluorescent particles, usually one per cell (Parry et al., 2014). The size of the GFP- $\mu$ NS particles, which  
215 was deduced by establishing a calibration between the particle sizes and their corresponding  
216 fluorescence intensities (Parry et al., 2014) (STAR Methods), ranged from  $\sim$ 50 to  $\sim$ 200 nm based on  
217 the level of protein expression in each cell (Figure S2).

218  
219 We tracked GFP- $\mu$ NS particles ( $n = 133,692$ ) and calculated their relative positions in the  
220 corresponding cells. We then binned all GFP- $\mu$ NS particles by size and, for each size bin, constructed  
221 a probability density map of the relative particle position in the cells (Figure 3F). These probability  
222 density maps indicate the likelihood of finding a GFP- $\mu$ NS particle at a specific intracellular location  
223 across cells. For particles in the bin with the smallest average particle size (51 nm), the probability  
224 density map appeared indistinguishable from that obtained for nanocage-GFP particles (Figure 3E),  
225 indicating that these particles are not excluded by the nucleoid. This pattern changed in the next size  
226 bin, as probes of an average size of 58 nm started to display an increased probability to be localized  
227 at the cell pole regions (i.e., away from the nucleoid). This enrichment in probability density of  
228 localization at the cell poles continued to increase with probe size (Figure 3F), with ever larger  
229 particles becoming less and less likely to be found within the nucleoid region. Particles with the

230 largest average size (150 nm) were almost completely excluded from the nucleoid, as shown by the  
231 high probability density of localization at the cell poles and the near-zero probability density  
232 elsewhere in the cell. While these ensemble results cannot provide an exact value, they approximate  
233 the apparent average nucleoid mesh size to be around 50 nm.

234

### 235 **The *E. coli* cytoplasm behaves as a poor solvent for the chromosome**

236 Based on  $c \approx 7$  mg/ml,  $b \approx 60$  nm and  $\xi \approx 50$  nm, we found that the corresponding Flory exponent,  $\nu$ ,  
237 is  $\sim 0.36$  (Eq. 1). Such a small Flory exponent ( $< 0.5$ ) implies that the bacterial cytoplasm is a poor  
238 solvent for the chromosome. Our conclusion is robust against variability in DNA concentration across  
239 cells (Figure 2D) or nutrient-poor or -rich growth conditions (see above). For instance, a DNA  
240 concentration of 8 mg/ml would correspond to an even smaller Flory exponent (Figure 4A). At DNA  
241 concentrations of 6 mg/ml, or even as low as 5 mg/ml, the Flory exponent,  $\nu$ , remains well below 0.5,  
242 consistent with the cytoplasm behaving as a poor solvent.

243

244 The phase diagram in Figure 4B shows that our conclusion is also robust to variations in DNA Kuhn  
245 length due to potential fluctuations in cytoplasmic ionic strength. To achieve the observed apparent  
246  $\sim 50$ -nm nucleoid mesh size in an ideal solvent ( $\nu = 0.5$ ) or a good solvent (e.g.,  $\nu = 0.58$ ), the Kuhn  
247 length of DNA at an average concentration of 7 mg/ml would have to be 26 nm or 13 nm, respectively  
248 (Eq. 1). This would mean a DNA persistence length (half the Kuhn length) equal to 13 nm or lower.  
249 Such a small value has never been observed experimentally even in solutions of extremely high ionic  
250 strength (e.g., 3-4 M NaCl) (Borochoy et al., 1981; Kam et al., 1981; Sobel and Harpst, 1991) or in the  
251 presence of multivalent ions such as  $Mg^{2+}$  (Baumann et al., 1997; Mantelli et al., 2011; Porschke, 1986;  
252 Porschke, 1991).

253

### 254 **A poor solvent promotes the organization of the chromosome into domains**

255 Intriguingly, for a DNA Kuhn length of 60 nm and an average DNA concentration of 7 mg/ml, Eq. 1  
256 indicates that the average mesh size decreases as the Flory exponent increases (i.e., as the solvent  
257 quality improves) (Figure 4A). To understand how the solvent quality of the cytoplasm affects the  
258 nucleoid mesh size at the given DNA concentration and Kuhn length, we performed 3D Monte Carlo  
259 simulations of chromosome conformation in poor ( $\nu = 0.36$ ), ideal ( $\nu = 0.50$ ) and good ( $\nu = 0.58$ )  
260 solvents (STAR Methods). For all simulations, we modeled the entire *E. coli* chromosome (4.6 million  
261 base pairs, contour length  $\approx 1.6$  mm) as a chain of 26,066 segments, with each segment having a  
262 length of 60 nm (corresponding to the Kuhn length). To achieve the average DNA concentration



263 observed in actual nucleoids (7 mg/ml), we confined the entire chromosome within a  
264 spherocylindrical space with a volume ( $0.70 \mu\text{m}^3$ ) equal to the experimentally determined average  
265 nucleoid volume in B-period cells (Figure 2C).

266

267 The simulations revealed a drastic difference in chromosomal conformation when varying the  
268 solvent quality (Video S2). The DNA density in the poor solvent appeared to be much more spatially  
269 heterogeneous than that in the ideal or good solvent. This was also evident in cross-sectional slices  
270 of simulated chromosomes in which each dot represents a DNA segment crossing the plane (Figure  
271 5A). The spatial heterogeneity of DNA density in the poor solvent condition compared to the other  
272 conditions was also apparent in the two-dimensional (2D) histograms showing the probability  
273 density of finding a DNA segment inside subregions of the nucleoid (Figure 5B). This result is  
274 consistent with the spatial heterogeneity of DNA density observed in super-resolution fluorescence  
275 images of bacterial nucleoids (Le Gall et al., 2016; Marbouty et al., 2015; Spahn et al., 2014; Spahn et  
276 al., 2018; Stracy et al., 2015).

277

278 In the poor solvent simulations, DNA segments were locally attracted to each other, leading to the  
279 formation of regions with high DNA density interspersed with regions of low DNA density. This  
280 spatial heterogeneity in DNA density created “holes” (Figure 5A; Video S2), which may increase the  
281 apparent average mesh size and allow larger objects to pass through the nucleoid. Meanwhile, the  
282 DNA density of the nucleoid was more spatially homogenous in the ideal and good solvents (Figure  
283 5A; Video S2), likely contributing to the smaller apparent average mesh size.

284

285 The denser, domain-like regions of the nucleoid in the poor solvent (Figure 5A-B; Video S2) reminded  
286 us of CIDs reported in Hi-C studies in *E. coli* and other bacteria (Le et al., 2013; Lioy et al., 2018;  
287 Marbouty et al., 2014; Marbouty et al., 2015; Val et al., 2016; Wang et al., 2017; Wang et al., 2015). To  
288 examine this more closely, we calculated the Euclidean distance between pairs of DNA loci along  
289 simulated chromosomes binned by 10-kilobase pairs. From this information, we created average  
290 maps that indicate the distances between the pairs of DNA loci along the entire simulated  
291 chromosomes or a 500-kb region under a poor, ideal or good solvent condition (Figure 5C-D). Along  
292 the diagonal of the distance maps, the distance is always 0 (black), because the separation between  
293 any given DNA locus and itself is zero by definition. Dark patches along the diagonal in the distance  
294 maps represent individual domain-like structures, in which DNA loci that extend a relatively large  
295 genomic distance remain in close spatial proximity to each other. Large domain-like structures were

296 only seen under the poor solvent condition (Figure 5C-D). Thus, by itself, the poor solvent quality of  
297 the cytoplasm results in the formation of chromosomal domains that are reminiscent of CIDs seen in  
298 Hi-C experiments.

299

300 However, the poor solvent quality of the cytoplasm alone cannot explain *where* these domains form.  
301 In our simulations, the DNA has no sequence information. Therefore, the formation of domains can  
302 occur anywhere along the DNA polymer, as shown by randomly averaging 10 different simulated  
303 chromosomes (Figure S3A). In Hi-C experiments, results are based on the average of billions of cells.  
304 In our case, averaging more simulated chromosomes (e.g., 100) resulted in the disappearance of  
305 distinct domain boundaries in distance maps (Figure 5E and Figure S3B). Interestingly, Hi-C  
306 experiments on rifampicin-treated *Caulobacter crescentus* cells show that global inhibition of  
307 transcription results in the dissolution of most domain boundaries (Le et al., 2013). Collectively, our  
308 results suggest that the poor solvent quality of the cytoplasm promotes domain formation, but DNA  
309 sequence-dependent factors (e.g., transcription) are responsible for setting the domain boundaries  
310 at consistent chromosomal locations across cells (see Discussion).

311

### 312 **Spatial heterogeneity in ribosome density within the nucleoid correlates negatively** 313 **with DNA density**

314 With the poor solvent quality of the cytoplasm resulting in spatial heterogeneity of DNA density, we  
315 reasoned that this may, in turn, affect the spatial distribution of other cytoplasmic components, even  
316 within the nucleoid region. Specifically, we hypothesized that ribosomes (which exist mostly in  
317 polyribosome form) are not only enriched outside of the nucleoid region (Azam et al., 2000; Bakshi  
318 et al., 2012; Gray et al., 2019; Robinow and Kellenberger, 1994; Sanamrad et al., 2014), but also  
319 heterogeneously distributed throughout the nucleoid due to its uneven DNA density. To test this  
320 hypothesis, we prepared frozen-hydrated cryo-electron tomography (cryo-ET) samples of  
321 exponentially growing *E. coli* cells (MG1655) (Figure 6A, STAR Methods). To visualize the native *E.*  
322 *coli* cytoplasm with higher contrast and resolution, we used cryo-focused ion beam (cryo-FIB) milling  
323 to produce lamellae of a thickness between 150 and 260 nm (Figure 6A and Figure S4A-B). Lamella  
324 reconstruction revealed ribosomes as dark spots distributed within the *E. coli* cytoplasm (Figure 6B;  
325 Video S3).

326

327 To precisely localize the ribosomes, we used the template search routines in emClarity (Himes and  
328 Zhang, 2018) to obtain 3D positions and orientations of the ribosomes detected in the lamella

329 tomograms. Sub-volumes of the detected ribosomes were aligned and classified (STAR Methods,  
330 Figure S4C-D) (Winkler, 2007; Winkler et al., 2009). The average ribosome structure calculated using  
331 the detected ribosomes was similar to that of the low-pass filtered reference structure (Figure 6C;  
332 Video S4) (Fu et al., 2019), suggesting a high degree of accuracy in our detection procedure. In total,  
333 we detected 5,028 ribosomes in the tomogram represented in Figure 6D. Based on the volume of the  
334 lamella ( $0.21 \mu\text{m}^3$ ), the average ribosome density in the tomogram was approximately  $24,000 \mu\text{m}^{-3}$ ,  
335 which is consistent with the reported ribosome density under similar growth conditions (Bakshi et  
336 al., 2012; Bremer and Dennis, 2008). We found that the density of (poly)ribosomes was highly  
337 heterogeneous across the lamella. This was readily apparent after the Gaussian smoothing of the  
338 ribosome density map (Figure 6E and Figure S4E). In addition to the expected accumulation of  
339 (poly)ribosomes at the cell periphery (i.e., away from the nucleoid region), (poly)ribosomes  
340 displayed heterogeneity in density across the cytoplasm, including within the expected nucleoid  
341 region (i.e., central region of the cell).

342

343 Since DNA cannot be directly visualized in the tomograms, we turned to fluorescence microscopy to  
344 examine whether the spatial heterogeneity in ribosome density within the nucleoid region is linked  
345 to differences in DNA densities. We imaged DAPI-stained *E. coli* cells (CJW7020) producing 50S  
346 ribosomal protein L1 tagged with monomeric superfolder GFP (Figure 7A-B). As before, in each cell  
347 ( $n = 1,126$ ), we identified the nucleoid outlines based on the DAPI signal (dotted lines in Figures 7A-  
348 B). When calculating the correlation between the DNA and ribosome fluorescence signals, we  
349 considered only image pixels well within the nucleoid region—at least two pixels away from the  
350 nucleoid outline (third row images in Figure 7A-B)—to prevent any bias in the correlation analysis  
351 due to the well-known enrichment of (poly)ribosomes outside the nucleoid region. We then  
352 calculated the correlation coefficient (Spearman's  $\rho$ ) between the fluorescence signals of DAPI (DNA)  
353 and L1-msfGFP (ribosome) at the single-pixel resolution. We found that even well within the  
354 nucleoid, the ribosome fluorescence signal correlates negatively with the DNA signal, as shown with  
355 two cell examples (Figure 7C-D) as well as at the population level ( $n = 1,126$  cells, Figure 7E). These  
356 findings are consistent with the idea that the solvent quality of the cytoplasm contributes to the  
357 uneven DNA density, which, in turn, affects (poly)ribosome localization (or vice versa, see  
358 Discussion).

359

360

## 361 **The poor solvent quality of the cytoplasm contributes to significant chromosome** 362 **compaction**

363 In addition to the internal mesh size and domain organization, compaction is another biophysical  
364 characteristic associated with the bacterial chromosome. A polymer is intrinsically more compact in  
365 a poor solvent because polymer segments preferentially interact with themselves rather than with  
366 the solvent. This fact prompted us to examine the level of compaction that the poor solvent quality of  
367 the cytoplasm could impose on the nucleoid. In our previous Monte Carlo simulations, the  
368 chromosome was modeled within the experimentally determined average volume of the nucleoid  
369 region ( $0.7 \mu\text{m}^3$ ) to keep the DNA concentration constant (i.e., 7 mg/ml) across solvent types. We  
370 performed another set of Monte Carlo simulations, but this time in an unbounded space to examine  
371 how the quality of the solvent affects the compaction of the chromosome (STAR Methods). The  
372 simulation results showed that the chromosome is most compact in the poor solvent condition, while  
373 being the most expanded in the good solvent (Video S5). The ideal solvent was associated with an  
374 intermediate phenotype.

375  
376 To quantify the size of each simulated chromosome, we calculated its radius of gyration (STAR  
377 Methods). In these calculations, we took into consideration the circular geometry of the bacterial  
378 chromosome. Given a fixed contour length, the geometric constraint of being circular forces the  
379 chromosome to adopt a smaller average size compared to that of a linear chain. Quantitatively, the  
380 average radius of gyration of a circular polymer is a factor of  $\sqrt{2}$  smaller than that of its linear  
381 counterpart (Casassa, 1965; Kramers, 1946; Rubinstein, 2003; Zimm and Stockmayer, 1949). We  
382 found that the volume of a circular DNA polymer of the same contour length as the *E. coli*  
383 chromosome is, on average,  $\sim 9 \mu\text{m}^3$  in a poor solvent ( $\nu = 0.36$ ) compared to  $\sim 100 \mu\text{m}^3$  in an ideal  
384 solvent ( $\nu = 0.50$ ) or  $\sim 550 \mu\text{m}^3$  in a good solvent ( $\nu = 0.58$ ) (Figure 8). Thus, the poor solvent quality  
385 of the cytoplasm results in an additional  $\sim 10$ - and  $\sim 60$ -fold chromosome compaction, compared to  
386 the ideal and good solvent, respectively. This result suggests that the poor solvent quality of the  
387 cytoplasm plays a large role in chromosome compaction.

388  
389 We note that this solvent effect alone cannot explain the full compaction of a single chromosome  
390 inside cells, as the actual volume of the nucleoid in B-period *E. coli* cells (Figure 2C) is still around 10  
391 times smaller (Figure 8, inset). This is consistent with other compacting factors (e.g., DNA  
392 supercoiling, NAPs and macromolecular crowding) playing important roles as well (see Discussion).  
393

## 394 **Discussion**

395 The conformation of a given polymer depends on the quality of its solvent (Genes, 1979; Rubinstein,  
396 2003), yet, the solvent quality of the cellular milieu for the chromosome has been long overlooked,  
397 most likely due to the lack of a suitable method for its measurement inside cells. In this study, we  
398 developed such a method by taking a simple polymer physics perspective of the bacterial cytoplasm  
399 as a semidilute polymer solution, in which the chromosome is the polymer and its solvent is  
400 comprised of everything else in the cytoplasm. Using this approach, we found that the *E. coli*  
401 cytoplasm is a poor solvent for the chromosome and that this physicochemical property inherently  
402 interconnects three different aspects of the chromosome inside cells: compaction, mesh size and  
403 domain organization.

404

### 405 **Chromosome compaction**

406 A significant level of compaction has long been considered mandatory for the bacterial chromosome  
407 to fit inside the cell. This was first suggested by early electron microscopy studies, where the  
408 chromosomes released from lysed cells were found to enlarge many times over the size of the cell  
409 (Kavenoff and Bowen, 1976; Kavenoff and Ryder, 1976). Dilution of NAPs and loss of macromolecular  
410 crowding are likely to contribute to this large nucleoid expansion, as often proposed. However, the  
411 solvent for the chromosome also drastically changed in these experiments, from the cytosol—a  
412 complex mixture of cytoplasmic components—to a simpler aqueous solution mostly composed of  
413 buffering reagents. Any considerable change in the chemical nature of a solvent is expected to affect  
414 the solvation and conformation of a dissolved polymer. In light of our finding that the cytoplasm  
415 behaves as a poor solvent for the chromosome, it is likely that the swelling of the chromosome  
416 following cell lysis is, at least in part, due to the release of the chromosome into a better solvent. Our  
417 work shows that in the cytoplasm, the chromosome is more likely to interact with itself compared to  
418 the rest of the cytoplasm. In such a poor solvent, preferential interaction (i.e., attraction) between  
419 parts of the chromosome compacts the entire chromosome ~10 to ~60 times more than if it were  
420 dissolved in an ideal or good solvent, respectively (Figure 8; Video S5).

421

422 Our finding also provided an opportunity for us to more carefully estimate how much a polymer of  
423 the contour length of the *E. coli* chromosome would need to be compacted to fit into the nucleoid  
424 region of an *E. coli* cell. Previous back-of-the-envelope calculations by different groups (Bloomfield,  
425 1997; Holmes and Cozzarelli, 2000; Joyeux, 2014; Jun, 2015; Trun and Marko, 1998; Verma et al.,  
426 2019), including ours (Surovtsev and Jacobs-Wagner, 2018), suggested a compaction on the order of

427 1000-fold. These estimations relied on three assumptions. (i) Without prior knowledge, the bacterial  
428 cytoplasm was assumed to be an ideal solvent for the chromosome. As such, the chromosome was  
429 treated as an *ideal* chain that assumes the conformation of a random walk. In other words, the net  
430 interaction between the chromosome and the rest of the cytoplasm was assumed to be zero. (ii) The  
431 DNA Kuhn length was assumed to be 100 nm (i.e., persistence length = 50 nm). This is a popular  
432 assumption, but in the context of the cell, it neglects the impact of the high ionic strength and  
433 presence of multivalent ions in the cytoplasm. Indeed, an underappreciated result in the  
434 aforementioned electron microscopy studies was the observation that expansion of the released  
435 chromosomes after cell lysis was considerably reduced with increasing salt concentrations (Kavenoff  
436 and Bowen, 1976). Furthermore, the phase diagram in Figure 4B shows that for a Kuhn length of 100  
437 nm (persistence length = 50 nm), the average mesh size would be 13 nm. Such a small average mesh  
438 size is incompatible with our findings (Figure 3) or the well-known coupling between transcription  
439 and translation in bacteria, which requires ribosomal subunits (~25 nm) to penetrate the nucleoid  
440 (see below). (iii) The chromosome was assumed to be linear, neglecting the small relative decrease  
441 in polymer size expected after adjusting for its circularity (Casassa, 1965; Kramers, 1946; Rubinstein,  
442 2003; Zimm and Stockmayer, 1949).

443  
444 After accounting for the solvent quality of the cytoplasm, the estimated rigidity of the DNA under  
445 physiological conditions and the circularity of the chromosome (STAR Methods), we found that the  
446 theoretical estimation of the chromosome goes down to ~9  $\mu\text{m}^3$ , which is only ~10-fold (as opposed  
447 to 1,000-fold) larger than its experimentally determined size in cells (Figure 8, inset). The remaining  
448 compaction needed is likely achieved by other compacting factors such as DNA supercoiling, NAPs,  
449 nucleoid-associated RNAs and macromolecular crowding (Cunha et al., 2001; Dame, 2005; de Vries,  
450 2010; Hammel et al., 2016; Jeon et al., 2017; Jun, 2015; Macvanin et al., 2012; Odijk, 1998; Pelletier  
451 et al., 2012; Qian et al., 2017; Shendruk et al., 2015; Wegner et al., 2016; Wu et al., 2019; Yang et al.,  
452 2020; Yoshikawa et al., 2010; Zhang et al., 2009; Zimmerman, 1993; Zimmerman and Minton, 1993),  
453 though some of these factors may also contribute to the poor solvent quality of the cytoplasm (see  
454 below).

455  
456 **Nucleoid mesh size**  
457 The membrane-less nucleoid not only stores genetic information but also functions as a mesh-like  
458 physical barrier that can affect the diffusion and spatial distribution of cytoplasmic components.  
459 Therefore, the mesh size of the nucleoid is an important length scale to consider. By assessing the

460 degree of nucleoid exclusion for fluorescent probes of varying sizes (25-150 nm), we estimate the  
461 apparent average nucleoid mesh size to be around 50 nm in exponentially growing *E. coli* cells (Figure  
462 3). This length scale has several physiological implications. For instance, it allows cytoplasmic  
463 components of sizes well below 50 nm (e.g., metabolites, proteins, most protein complexes) to diffuse  
464 unimpededly in the presence of the nucleoid. As a result, most of the cytoplasm is “well mixed”,  
465 facilitating biochemical processes. Since the sizes of free ribosomal subunits are ~23 to 26 nm  
466 (Boublik, 1985; Verschoor et al., 1985; Zhu et al., 1997), the 50-nm exclusion size of the nucleoid also  
467 enables the coupling between transcription and translation by allowing free ribosomal subunits to  
468 reach nascent mRNAs within the nucleoid through diffusion (Sanamrad et al., 2014). If the cytoplasm  
469 was an ideal or good solvent, our work suggests that the observed high concentration of the DNA (7  
470 mg/ml) within the nucleoid region would lead to an average mesh size of 20 nm or smaller (Figure  
471 4B) due to the relatively high overlapping of DNA segments with each other (Figure 5A; Video S2).  
472 Such a small average mesh size would, at least partly, exclude ribosomes and their subunits from the  
473 nucleoid, hindering co-transcriptional translation. Under this scenario, translation would have to  
474 primarily take place after transcription has completed and bare (ribosome-free) mRNAs have  
475 diffused out of the nucleoid. Such a decoupling between transcription and translation would not only  
476 lead to a delay in protein synthesis, but may also shorten the lifetime of mRNAs, as ribosome binding  
477 reduces mRNA degradation (Deana and Belasco, 2005; Dreyfus, 2009).

478  
479 Our data predict that the diffusion and spatial distribution of cytoplasmic components larger than 50  
480 nm are impacted by the presence of the nucleoid in the cytoplasm. We expect that some (possibly  
481 most) polyribosome species belong to this category. This reasoning is consistent with the  
482 observation that ribosomes, which are mostly found as polyribosomes (Dai et al., 2016;  
483 Forchhammer and Lindahl, 1971; Phillips et al., 1969; Varricchio and Monier, 1971), display  
484 timescale-dependent sub-diffusive dynamics (Gray et al., 2019), as we may expect for objects that  
485 experience caging and uncaging events (Brangwynne et al., 2009; Cai et al., 2011; Guo et al., 2014;  
486 Tseng et al. 2004; Wong et al., 2004). Furthermore, other experiments suggest that gene loci and  
487 active RNA polymerases (and associated nascent mRNAs) preferentially relocate to the nucleoid  
488 periphery during transcription and translation (Cabrera and Jin, 2003; Libby et al., 2012; Stracy et  
489 al., 2015; Yang et al., 2019). Once polyribosomes escape the nucleoid, they are less likely to get back  
490 inside the nucleoid due to their large size. As a consequence, nucleoid exclusion of polyribosomes  
491 leads to ribosome enrichment outside the nucleoid (Azam et al., 2000; Bakshi et al., 2012; Gray et al.,  
492 2019; Robinow and Kellenberger, 1994; Sanamrad et al., 2014). The spatial heterogeneity of the DNA

493 density across the nucleoid implies that some regions of the nucleoid are more compacted than  
494 others. This is consistent with the spatial heterogeneity of (poly)ribosomes seen by cryo-electron  
495 tomography (Figure 6 and Figure S4) and fluorescence microscopy (Figure 7). We expect that the  
496 motion and spatial distribution of other large (>50 nm) cellular components, such as storage  
497 granules, plasmids, bacterial microcompartments (protein-based metabolic organelles) and stress-  
498 induced protein aggregates, are also impacted by the nucleoid, for which there is some evidence  
499 (Chowdhury et al., 2014; Henry and Crosson, 2013; Racki et al., 2017; Reyes-Lamothe et al., 2014;  
500 Wang et al., 2016; Winkler et al., 2010).

501

### 502 **Chromosome domain organization**

503 The bacterial chromosome is not simply stuffed into the cell; it is instead organized over several  
504 length scales (Dame et al., 2020; Verma et al., 2019). Notably, recent Hi-C experiments have shown  
505 that the chromosome is partitioned into various domains (CIDs) in which DNA loci preferentially  
506 interact with each other (Le et al., 2013; Lioy et al., 2018; Marbouty et al., 2014; Marbouty et al., 2015;  
507 Val et al., 2016; Wang et al., 2017; Wang et al., 2015). How these domains form is not fully understood.  
508 Our Monte Carlo simulations show that at the physiological DNA concentration of 7 mg/ml, a poor  
509 solvent leads to high spatial heterogeneity in DNA density within the nucleoid (Figure 5A-B; Video  
510 S2), which is consistent with 3D super-resolution fluorescence microscopy observations of  
511 fluorescently-labeled nucleoids in *E. coli* (Le Gall et al., 2016; Marbouty et al., 2015; Spahn et al., 2014;  
512 Spahn et al., 2018; Stracy et al., 2015). Such spatial heterogeneity is a consequence of the formation  
513 of much less dense DNA regions. By calculating the distance between pairs of DNA segments, we  
514 found that the dense regions of the simulated chromosomes correspond to neighboring segments  
515 that are spatially clustered together (Figure 5C-D), forming domain-like structures of resemblance to  
516 CIDs in Hi-C experiments. In contrast, the simulated chromosomes in an ideal or good solvent were  
517 much more homogenous in DNA density (Figure 5B), showing very few, if any, domains of significant  
518 size (Figure 5C-D). This argues that the poor solvent quality of the cytoplasm promotes the  
519 spontaneous formation of chromosomal domains. There is a precedent for such a solvent-driven  
520 structural organization of a biopolymer, as protein folding is highly dependent on the poor solvent  
521 condition in vitro (Haran, 2012).

522

523 In our simulated chromosomes, domain boundaries were able to form at any chromosomal position  
524 (Figure S3A). As a result of this stochasticity, boundaries between domains became increasingly less  
525 defined as more distance maps of simulated chromosomes were averaged (Figure 5E and Figure



526 S3B). This is in contrast with Hi-C contact maps in which boundaries of CIDs remain visible despite  
527 averaging over billions of cells. Our data therefore suggest that the poor solvent quality of the  
528 cytoplasm promotes domain organization of the chromosome, but the specific positions of the  
529 domain boundaries seen in Hi-C maps must be attributed to other factors. Indeed, high  
530 transcriptional activity is an important determinant of CID boundaries (Le et al., 2013; Le and Laub,  
531 2016; Lioy et al., 2018; Marbouty et al., 2015). In our simulated chromosomes, the domains and their  
532 boundaries correspond to DNA regions of high and low densities, respectively. This also appears to  
533 be true inside cells, as DNA at the CID boundaries is less condensed (more extensible) than the DNA  
534 within CIDs (Le and Laub, 2016). Besides gene expression, other factors, such as NAP binding and  
535 membrane attachment, may also contribute to the predominance of specific domain boundaries  
536 across cells (Lioy et al., 2018; Marbouty et al., 2014).

537

538 Our observation that distinct domain boundaries vanished upon averaging a large number of  
539 simulated chromosomes (Figure 5E and Figure S3B) highlights how variability in domain  
540 organization may be missed in Hi-C experiments performed on cell populations. At the single-cell  
541 level, the structure of the actual chromosome (e.g., size and position of the domains and their  
542 boundaries) may considerably differ across cells or change over time, which would be obscured after  
543 averaging all identified contacts between DNA loci across a cell population. Consistent with this idea,  
544 single-cell Hi-C experiments in eukaryotes have shown that chromosome folding is highly  
545 heterogeneous across cells, with the positions of contact enrichments being highly variable (Flyamer  
546 et al., 2017; Nagano et al., 2013; Nagano et al., 2017; Ramani et al., 2017; Stevens et al., 2017; Tan et  
547 al., 2018; Tan et al., 2019). It would be interesting to perform similar single-cell Hi-C experiments in  
548 bacteria. Based on our results, we envision that the solvent quality of the cytoplasm may contribute  
549 to some stochasticity in chromosome conformation.

550

### 551 **What may contribute to the poor solvent quality of the cytoplasm?**

552 There are many ways a solution can be a poor solvent for a given polymer. A poor solvent is a solution  
553 in which the net interaction between the polymer and the solvent is energetically unfavorable  
554 regardless of the nature of such interactions (e.g., electrostatic, hydrophobic, van der Waals, or  
555 hydrogen bonding). Due to the complex chemical composition of the bacterial cytoplasm, the  
556 observed poor solvent quality of the cytoplasm is unlikely to originate from a single mechanism. A  
557 combination of factors is expected to be in action.

558

559 Among these factors, NAPs are attractive candidates. Due to their high abundance and specific  
560 interactions with the chromosome, the contribution of NAPs to the poor solvent quality of the  
561 cytoplasm may be direct or indirect. In vitro, NAPs have been shown to bend, loop, wrap or bridge  
562 DNA segments (Dame et al., 2020; Dillon and Dorman, 2010). These molecular interactions may  
563 promote local attraction among nearby chromosomal segments in vivo. In addition, we speculate that  
564 NAPs, and potentially other DNA-binding proteins (such as transcriptional regulators), may act as an  
565 interface that indirectly modulates the chemical interaction between the chromosome and other  
566 cellular components of the cytoplasm. Protein binding to the anionic DNA polymer could, for  
567 instance, locally alter the electrostatic potential of the chromosome.

568  
569 There are several lines of evidence suggesting that RNAs may also contribute to the poor solvent  
570 quality of the cytoplasm for the DNA. (i) Rifampicin treatment of *E. coli*, which blocks transcription  
571 initiation and leads to mRNA depletion through degradation (Bernstein et al., 2002; Chen et al., 2015;  
572 Selinger et al., 2003), results in nucleoid expansion (Bakshi et al., 2014; Bakshi et al., 2012; Cabrera  
573 et al., 2009; Cabrera and Jin, 2003; Dworsky and Schaechter, 1973; Pettijohn and Hecht, 1974; Sun  
574 and Margolin, 2004). Conversely, chloramphenicol treatment, which stabilizes mRNAs (Lopez et al.,  
575 1998; Pato et al., 1973; Schneider et al., 1978), is associated with nucleoid compaction (Bakshi et al.,  
576 2014; Bakshi et al., 2012; Cabrera et al., 2009; van Helvoort et al., 1996; Zimmerman, 2002). These  
577 observations are often interpreted as a consequence of a loss or gain of polyribosome crowding in  
578 rifampicin- or chloramphenicol-treated cells, respectively. The idea is that polyribosomes create a  
579 depletion force through a volume exclusion effect. However, a mutually non-exclusive alternative is  
580 that the chemical nature of these mRNAs, and not just the size of the polyribosomes, plays a role by  
581 affecting the quality of the solvent for the chromosome. (ii) The spatial organization of gene  
582 expression in *E. coli* is also consistent with RNAs contributing to the poor solvent quality of the  
583 cytoplasm. As mentioned above, although transcription can start within the nucleoid, gene loci have  
584 been shown to relocate to the nucleoid periphery during transcription (Libby et al., 2012; Yang et al.,  
585 2019). This is consistent with the accumulation of active RNA polymerases at the periphery of the  
586 nucleoid and regions of low DNA densities (Stracy et al., 2015). This has led to a model in which  
587 actively transcribed gene loci with their associated RNA polymerases and nascent mRNAs segregate  
588 away from the nucleoid bulk. Importantly, gene relocation occurs independently of concurrent  
589 translation, i.e., without the loading of the bulky ribosomes (Yang et al., 2019). These observations  
590 support the idea that the interaction between mRNA and DNA is unfavorable (i.e., repulsive). (iii)  
591 Repulsive interaction between mRNA and DNA is also consistent with the finding that high levels of

592 long transcripts drive the local establishment of chromosomal domain boundaries (Le et al., 2013; Le  
593 and Laub, 2016; Lioy et al., 2018; Marbouty et al., 2015). At the domain boundary, high  
594 transcriptional activity leads to an accumulation of nascent mRNAs. Since these mRNAs are still  
595 bound to the DNA through the RNA polymerases, they cannot diffuse away. We envision that in order  
596 to minimize the contact with these bound mRNAs, nearby DNA strands retract to the flanking sides,  
597 reducing their local density at the boundary while forming denser DNA regions (domains) on both  
598 sides of the boundary. Such a DNA retraction would be mainly driven by its unfavorable interaction  
599 with the mRNA and not by the steric blocking of ribosomes, as the formation of a domain boundary  
600 occurs in the absence of translation (Le and Laub, 2016).

601

602 Another potential contributing factor to the poor solvent quality of the cytoplasm is its high ionic  
603 strength (Alatossava et al., 1985; Cayley et al., 1991; Kuhn and Kellenberger, 1985; Lusk et al., 1968;  
604 Moncany and Kellenberger, 1981; Roe et al., 1998; Schultz et al., 1962). In vitro studies have shown  
605 that the net interaction between DNA fragments becomes more attractive with increasing salt  
606 concentrations (Nicolai and Mandel, 1989). Divalent  $Mg^{2+}$ , but not monovalent  $Na^+$ , has been found  
607 to not only screen the charges on DNA but also induce attraction among the strands (Qiu et al., 2007).  
608 Overall, the poor solvent quality is likely to originate from interspersed and superimposed molecular  
609 interactions associated with the complex chemical nature of the bacterial cytoplasm.

610

## 611 **Acknowledgements**

612 We are grateful to Dr. David Baker for the nanocage-producing strain and to Drs. Corey O'Hern,  
613 Thierry Emonet and Eric Dufresne for valuable feedback. We also thank the members of the Jacobs-  
614 Wagner laboratory for fruitful discussions and for critical reading of the manuscript. This work was  
615 partially supported by the National Institute of Allergy and Infectious Diseases (R01AI087946 and  
616 R01AI132818 to J.L.). C.J.-W. is an investigator of the Howard Hughes Medical Institute.

617

## 618 **Author Contributions**

619 Conceptualization, Y.X. and C.J.-W.; Methodology, Y.X., I.V.S., Y.C., S.K.G., B.R.P. and C.J.-W. Software,  
620 Y.X.; Formal Analysis, Y.X., I.V.S., Y.C. and B.R.P.; Investigation, Y.X., I.V.S., Y.C., S.K.G. and B.R.P.; Data  
621 Curation, Y.X., I.V.S., Y.C., S.K.G. and B.R.P.; Writing – Original Draft, Y.X. and C.J.-W.; Writing – Review  
622 & Editing, Y.X., I.V.S., Y.C., S.K.G., B.R.P., J.L. and C.J.-W.; Visualization, Y.X., I.V.S., Y.C. and C.J.-W.;  
623 Supervision, J.L. and C.J.-W.; Project Administration, C.J.-W.; Funding Acquisition, C.J.-W.

624

## 625 **Declaration of Interests**

626 The authors declare no competing interests.

627

## 628 **Figure legends**

### 629 **Figure 1. The *E. coli* cytoplasm viewed from a polymer physics perspective.**

630 Schematic showing the *E. coli* chromosome folded into a meshwork structure known as the nucleoid.

631 The nucleoid mesh size is denoted as  $\xi$ . The cytoplasm can be viewed as a semidilute polymer

632 solution, where the DNA is the polymer and the rest of the cytoplasm acts as its solvent.

633

### 634 **Figure 2. Estimation of the average DNA concentration in the nucleoid region in B-period *E. coli* cells.**

636 A. Fluorescence images of representative DAPI-stained CJW6324 cells in different cell cycle periods:  
637 B, C and D periods (i.e., before, during and after the DNA replication). The green and yellow outlines  
638 are the cell and nucleoid contours detected by the software package Oufiti.

639 B. Plot showing the relative area of the SeqA-mCherry signal as a function of cell area. The contour  
640 lines (from light to dark color) represent the 25%, 50% and 75% probability envelopes of the data.

641 C. Probability density function of the estimated nucleoid volume in B-period cells.

642 D. Probability density function of the average DNA concentration calculated based on the total mass  
643 of the *E. coli* chromosome and the nucleoid volume measurements shown in panel C.

644 See also Figure S1.

645

### 646 **Figure 3. Estimation of the average nucleoid mesh size.**

647 A. Schematic of an assembled nanocage-GFP particle. The particle has a dodecahedron shape (Hsia et  
648 al., 2016).

649 B. Fluorescence images of nanocage-GFP particles assembled in *E. coli* cells (CJW6340).

650 C. Example of nanocage-GFP particle trajectory. The gray outline indicates the cell contour detected  
651 by the Oufiti software package using the corresponding phase image of the cell.

652 D. Log-log ensemble-averaged mean squared displacement (MSD) based on individual trajectories of  
653 nanocage-GFP particles ( $n = 85$ ). The slope ( $\alpha = 0.97$ ) was fitted based on the first three time delays.

654 E. Probability density map of the localization of nanocage-GFP particles. The density map was  
655 constructed by plotting the normalized 2D histogram of the relative particle positions.

656 F. Probability density maps of the localization of GFP- $\mu$ NS particles as a function of their size. The  
657 positions of the particles ( $n = 133,692$ ) were determined relative to the cell contours. Particles were

658 then binned by their sizes, as indicated. For each particle-size bin, a probability density map of  
659 particle localizations was constructed, as described in panel E.

660 See also Figure S2 and Video S1.

661

662 **Figure 4. Relationship between solvent quality, polymer concentration, Kuhn length and mesh**  
663 **size.**

664 A. Plot showing the average mesh size of the nucleoid as a function of the Flory exponent, with a DNA  
665 Kuhn length of 60 nm and various DNA concentrations (5, 6, 7 or 8 mg/ml) calculated using Eq. 1.

666 B. Heatmap showing the average nucleoid mesh size calculated using Eq. 1 with different  
667 combinations of DNA Kuhn lengths and Flory exponents, at a given DNA concentration of 7 mg/ml.

668

669 **Figure 5. Monte Carlo simulations of the *E. coli* chromosome conformation in different types**  
670 **of solvent.**

671 The entire *E. coli* chromosome was modeled using Monte Carlo simulations (STAR Methods).  
672 Chromosomes were simulated within the confinement of a spherocylinder with a volume equal to  
673 that of an average nucleoid ( $\sim 0.7 \mu\text{m}^3$ ) in a poor ( $\nu = 0.36$ ), ideal ( $\nu = 0.50$ ) and good solvent ( $\nu =$   
674  $0.58$ ). The Kuhn length of the DNA was assumed to be 60 nm.

675 A. Example slices of simulated chromosomes in a poor, ideal or good solvent. Each dot represents a  
676 DNA segment going in or out of the slices (XY- or YZ- plane).

677 B. Density maps of the slices shown in panel A. The maps were constructed as the normalized 2D  
678 histograms of positions of the simulated DNA segments.

679 C. Distance maps indicating the spatial separation between any two loci along the simulated  
680 chromosomes in the poor, ideal or good solvent. Each map is a result of averaging 10 simulated  
681 chromosomes.

682 D. Distance maps as in panel C, except for showing only the first 500-kb region of the simulated  
683 chromosomes.

684 E. Distance maps as in panel D, except that 100 simulated chromosomes were averaged instead of 10.

685 See also Figure S3 and Video S2.

686

687 **Figure 6. Spatial distribution of ribosomes in *E. coli* tomograms.**

688 A. Schematic showing the preparation procedure for the cryo-ET samples. Wild-type *E. coli* cells  
689 (MG1655) were harvested in exponential phase, concentrated by centrifugation, deposited on the

690 grid and vitrified in liquid ethane. Using cryo-FIB milling, a thin lamella sample of thickness between  
691 155 and 260 nm was obtained for the cryo-ET imaging.

692 B. Example section of the tomogram.

693 C. Comparison between the reference ribosome structure (gray) and the averaged structure (yellow)  
694 derived from ribosomes localized in the lamella tomogram shown in panel B. An *E. coli* 70S ribosome  
695 structure (EMD-20173) was used as the reference (Fu et al., 2019). See also Video S4 for a 3D  
696 overview.

697 D. Maps showing localized ribosome structures (yellow) with the positions and orientations  
698 determined in the tomogram shown in panel B.

699 E. Probability density maps of ribosome structures localized in the tomogram in panel B. The top  
700 represents the probability density map of the localizations of ribosomes determined from the  
701 tomogram. The map was constructed as a 2D histogram of the ribosome positions in the XY-plane.  
702 The bottom map was obtained after Gaussian smoothing ( $\sigma = 1.2$  pixel, 21 nm) of the top map to more  
703 clearly show subcellular regions with high and low density in ribosomes.

704 See also Figure S4, Video S3 and Video S4.

705

### 706 **Figure 7. Pixel intensity correlation between DNA and ribosome fluorescence signals**

707 A. Fluorescence micrographs showing an example cell (CJW7020) with a strong negative correlation  
708 (Spearman's  $\rho = -0.89$ ) between the DNA and ribosome fluorescence signals. The cell outlines are  
709 depicted as white solid lines, whereas the nucleoid outlines are shown as either black or white dash  
710 lines. The images are shown using either the conventional gray scale or a color scale. The bottom row  
711 shows only the pixels enclosed well within the nucleoid, at least two pixels away from the nucleoid  
712 outline (STAR Methods). These pixels were used for the correlation calculation.

713 B. Similar to panel A, except for showing an example cell with a more common negative correlation  
714 (Spearman's  $\rho = -0.60$ ) between DNA and ribosome fluorescence signals.

715 C. Scatter plot showing the pixel intensity correlation between DAPI and L1-msfGFP signals obtained  
716 in the cell shown in panel A.

717 D. Similar to C, except for showing the corresponding pixel intensity correlation in the cell shown in  
718 panel B.

719 E. Probability density function of pixel intensity correlations calculated among the cell population ( $n$   
720 = 1,126).

721

722

723 **Figure 8. Chromosome compaction in different types of solvent.**

724 Bar graph showing the mean volume of 1,000 simulated chromosomes in each type of solvent. The  
725 error bars represent the 95% confidence interval of the mean. The inset shows a comparison  
726 between the volume of the nucleoid observed in the B-period *E. coli* cells (see Figure 2C) and the  
727 volume calculated for simulated chromosomes ( $n = 1,000$ ) in the poor solvent.

728 See also Video S5.

729

730 **Supplemental figure legends**

731 **Figure S1. Related to Figure 2. Comparison of DNA concentration measurements at 30°C and**  
732 **37°C growth temperatures.**

733 Probability density functions of the average DNA concentrations estimated within the nucleoid  
734 region in B-period cells (CJW6324) grown at either 30°C (green) or 37°C (red).

735

736 **Figure S2. Related to Figure 3. Example GFP- $\mu$ NS particles of various sizes.**

737 Each panel shows a GFP fluorescence image of an *E. coli* cell (CJW4617). The GFP- $\mu$ NS particles  
738 appeared as distinct bright spots. The particle size is indicated in the upper right corner. The green  
739 and yellow outlines are the cell and nucleoid contours detected by the Oufiti software package.

740

741 **Figure S3. Related to Figure 5. Monte Carlo simulations of *E. coli* chromosomes.**

742 A. Six examples of distance maps indicating the spatial separation between any two loci along  
743 simulated chromosomes in a poor solvent ( $\nu = 0.36$ ). Each map is the result of averaging 10 randomly  
744 selected simulated chromosomes.

745 B. Distance maps obtained by averaging 100 simulated chromosomes in a poor ( $\nu = 0.36$ ), ideal ( $\nu =$   
746  $0.50$ ) and good solvent ( $\nu = 0.58$ ). Same as Figure 5E, except for showing the distance maps for the  
747 full simulated chromosomes.

748 C. Scaling between the number of segments and the normalized  $R_g$  of simulated chromosomes in  
749 different types of solvent. For a better comparison in the scaling, the  $R_g$  of the simulated  
750 chromosomes of different numbers of segments were normalized by the  $R_g$  of the chromosome with  
751 10 segments. Each point is based on the average of 200 simulated chromosomes. Note that the scaling  
752 was only shown for small length scales because the excluded volume interactions are screened for  
753 polymers at large length scales. As a result, the scaling exponent becomes 0.5, regardless of the  
754 solvent quality (Rubinstein, 2003).

755

756 **Figure S4. Related to Figure 6. Localization of ribosomes using cryo-ET**

757 A. Representative scanning electron microscope (SEM) image showing the *E. coli* cells on the grid  
758 before the cryo-FIB milling.

759 B. Top view of the SEM image showing a lamella after the final polishing in cryo-FIB milling.

760 C. From left to right, each panel represents the same tomogram section overlaid with the ribosomes  
761 identified by the initial 3D template search, after the removal of structures in the false class, and after  
762 the removal of duplicate structures. In each case, the number of localized ribosome structures ( $n$ ) is  
763 indicated in the top right, and their positions are marked by the green circles.

764 D. Representative structures in the true and false classes during classification of the candidate 70S  
765 ribosome structures found in the 3D template search.

766 E. Additional examples of probability density maps of ribosome structures localized in tomograms.  
767 All maps were Gaussian smoothed ( $\sigma = 1.2$  pixel, 21 nm) for easier visualization of the ribosome  
768 regions of low and high densities.

769

770 **STAR Methods**

771 **Strains and growth conditions**

772 This study used the following published strains. MG1655 (F-lambda- *ilvG*- *rfb*-50 *rph*-1) was used as  
773 a wild-type *E. coli* strain (Jensen, 1993). Strain CJW6324 (MG1655 *seqA*::*seqA-mcherry* *ftsZ*::*ftsZ*-  
774 *venus*<sup>SW</sup>) was used to separate the cell population into three distinct groups that corresponded to the  
775 cells in the B, C and D periods (Gray et al., 2019). Strain CJW6340 (BL21 Star (DE3) pET29b+ I3-01-  
776 sfgfp) was obtained as a kind gift from David Baker's laboratory at the University of Washington (Hsia  
777 et al., 2016). In this strain, the artificially designed protein I3-01 fused to superfolder GFP (I3-  
778 01(ctGFP)) was produced from the pET29b+ plasmid in BL21 Star (DE3) *E. coli* cells. I3-01(ctGFP)  
779 assembles into dodecahedron nanocage particles (Hsia et al., 2016). Strain CJW4617 (MG1655  
780  $\Delta$ *lacZYA*::*gfp*- $\mu$ NS) produces GFP- $\mu$ NS particles of tunable sizes in response to IPTG induction (Parry  
781 et al., 2014). Strain CJW7020 (MG1655 *rplA*::*rplA-msfgfp*) was used to investigate the pixel intensity  
782 correlation between DNA and ribosome fluorescence signals (Gray et al., 2019).

783

784 To obtain steady-state growth conditions, a sample of an overnight liquid cell culture in stationary  
785 phase was diluted by a factor of at least 10,000 in the corresponding fresh growth medium. The  
786 culture was then allowed to grow in an incubator shaker (New Brunswick Innova 44), at the indicated  
787 temperature, to reach an optical density at 600 nm (OD<sub>600</sub>) of 0.1-0.3 prior to microscopy.

788



789

## 790 **Light microscopy and image analysis**

791 Unless otherwise specified, all exponentially growing cells were imaged on 1% agarose pads  
792 supplemented with growth medium. When appropriate, cultures were incubated with 1  $\mu\text{g}/\text{ml}$  4',6-  
793 diamidino-2-phenylindole (DAPI) for 15 min in growth medium prior to imaging on agarose pads.  
794 Phase contrast and epifluorescence imaging were performed on a Nikon Eclipse Ti-E microscope  
795 equipped with a phase contrast Nikon CFI Plan Apo DM Lambda 100x oil objective (NA = 1.45), and  
796 a SOLA light engine (Lumencor). A Ph3 phase contrast ring was used. The following Chroma filters  
797 were used for epifluorescence imaging: DAPI (excitation D390/22x, dichroic T425lpxr, emission  
798 ET460/50m), GFP (excitation ET470/40x, dichroic T495lpxr, emission ET525/50m),  
799 mCherry/TexasRed (excitation ET560/40x, dichroic T585lp, emission ET630/75m). The microscope  
800 was controlled by the NIS-Elements AR software.

801

802 Using the open source software Oufiti (Paintdakhi et al., 2016), cell and nucleoid outlines were  
803 constructed based on the phase contrast and epifluorescence images, respectively. When  
804 appropriate, cells were classified into the B, C and D cell-cycle periods based on two cell features:  
805 SeqA-mCherry pattern and cell area, as described before (Gray et al., 2019).

806

## 807 **Derivation of the nucleoid mesh size**

808 The correlation length  $\xi$  (i.e., mesh size) of a semidilute polymer solution is defined as  $\xi =$   
809  $R_g(c^*/c)^{\nu/(3\nu-1)}$  (Cooper et al., 1991; Dasgupta et al., 2002; Gennes, 1979; Rubinstein, 2003), where  
810  $R_g$  is the radius of gyration,  $c$  is the polymer concentration, and  $\nu$  is the Flory exponent. The overlap  
811 concentration  $c^*$ , above which polymer segments overlap to form a mesh can be written as  $c^* =$   
812  $3M_w N b / (4\pi R_g^3 N_A l_{\text{base}})$  (Mutch et al., 2007; Ramakrishnan et al., 2002), where  $M_w$  is the average  
813 molecular weight of the base pair (650 g/mol) (Lee et al., 2012; Peale et al., 1989; Ratilainen et al.,  
814 2001),  $N$  is the number of polymer segments,  $b$  is the Kuhn length,  $l_{\text{base}}$  is the size of a base pair (0.34  
815 nm) (Diekmann et al., 1982; Yonemura and Maeda, 1982), and  $N_A$  is the Avogadro's number. For a  
816 circular polymer,  $R_g = (\sqrt{3}/6) b N^\nu$  (Rubinstein, 2003). Plugging both the  $R_g$  and  $c^*$  into the above  
817 definition, we have  $\xi = (\sqrt{3}/6) b N^\nu [18\sqrt{3} M_w N b / (\pi b^3 N^{3\nu} N_A l_{\text{base}} c)]^{\nu/(3\nu-1)}$ , which can be simplified  
818 to yield Eq. 1 above:  $\xi = (\sqrt{3}/6) b^{(\nu-1)/(3\nu-1)} [18\sqrt{3} M_w / (\pi c N_A l_{\text{base}})]^{\nu/(3\nu-1)}$ . To verify the dimension  
819 of this result, we note the term  $18\sqrt{3} M_w / (\pi c N_A l_{\text{base}})$  has a dimension of area. Since  $b$  has a  
820 dimension of length and  $(\nu - 1)/(3\nu - 1) + 2\nu/(3\nu - 1) = 1$ ,  $\xi$  correctly has a dimension of length.

821

## 822 **Estimation of the average DNA concentration within nucleoids of *E. coli* in the B period**

823 *E. coli* strain CJW6324 was grown at 37°C in M9 minimal medium supplemented with glycerol (0.2%).  
824 To estimate the average DNA concentration within the nucleoid regions, B-period cells (with a single  
825 chromosome) were first identified (see above). Given that the average molecular weight of a  
826 nucleotide base pair is 650 g/mol (Lee et al., 2012; Peale et al., 1989; Ratilainen et al., 2001) and the  
827 *E. coli* genome size is about 4.6 million base pairs (Blattner et al., 1997), the total DNA mass in a single  
828 chromosome is around 5 femtograms. The nucleoid volume was estimated as  $V_{\text{nucleoid}} =$   
829  $V_{\text{cell}}(A_{\text{nucleoid}}/A_{\text{cell}})^{3/2}$ , where  $V_{\text{nucleoid}}$ ,  $V_{\text{cell}}$ ,  $A_{\text{nucleoid}}$ ,  $A_{\text{cell}}$  are the volumes and areas of the nucleoid  
830 and cell. The cell volume was calculated by accumulating the volume of slices defined by neighboring  
831 pairs of points along the cell outlines (Paintdakhi et al., 2016) (see also documentation on oufti.org).  
832 The nucleoid and cell areas were calculated by summing up the areas of the polygons defined by the  
833 nucleoid and cell outlines. The power 3/2 was used to convert the estimated nucleoid area fraction  
834 into a volume fraction. The nucleoid volume estimation was performed at the single-cell level, as was  
835 the DNA concentration calculation, which was simply a division between the estimated DNA mass  
836 and the nucleoid volume.

837

## 838 **Estimation of the average DNA concentration within nucleoids of *E. coli* in nutrient-** 839 **rich conditions**

840 Bulk studies using the diphenylamine colorimetric assay and cell counting reported that the average  
841 DNA mass per cell under nutrient-rich conditions, glucose, glucose plus casamino acids and rich  
842 defined medium plus glucose as carbon sources, were around 10, 14 and 30 fg, respectively (Basan  
843 et al., 2015). The average cell sizes among these growth conditions (i.e. 2.32, 3.33, 6.60  $\mu\text{m}^3$ ,  
844 respectively) were also shown to scale linearly with the average DNA mass per cell (Basan et al.,  
845 2015). Taking into consideration of the strong scaling between the nucleoid size and cell size (Gray  
846 et al., 2019), we estimated the average DNA concentration within the nucleoid to be 7.3, 7.1 and 7.7  
847 mg/ml under these three nutrient-rich growth conditions. Therefore, when taken together, the DNA  
848 concentration within the nucleoid among these nutrient-rich conditions is  $7.4 \pm 0.2$  mg/ml.

849

## 850 **Single-particle tracking experiments**

851 GFP-tagged nanocage particles were produced through basal expression of the GFP-tagged protein  
852 subunit I3-01 in *E. coli* cells (CJW6340) grown at 30°C in M9 minimal medium supplemented with  
853 glycerol (0.2%), casamino acids (0.1%) and thiamine (1  $\mu\text{g}/\text{ml}$ ). Phase contrast images were taken

854 first to define cell outlines. Time-lapse fluorescence images were then acquired at a frame rate of 100  
855 ms. Nanocage particles were localized and tracked using the MATLAB class SPT (see supplementary  
856 code). Briefly, an image was first smoothed by a band-pass filter. Potential regions containing the  
857 particles were then segmented based on an intensity threshold. Based on the region sizes,  
858 background noise pixels or particle clusters were filtered out. Within each of the remaining  
859 segmented regions, the brightest pixel was located. On the brightest pixel and its eight surrounding  
860 pixels, the pixel intensities were fitted by a 2D Gaussian distribution, whose center was taken as the  
861 estimated particle position. The particle locations were linked into trajectories using an algorithm  
862 described previously (Crocker and Grier, 1996). The 2D mean squared displacements (MSD) plot  
863 were calculated as  $MSD(\tau) = \langle (r(t + \tau) - r(t))^2 \rangle$ , where  $\tau$  is a given time delay and  $r(t)$  and  
864  $r(t + \tau)$  denote the particle positions before and after the given time delay. Similarly, GFP- $\mu$ NS  
865 particles were produced through IPTG induction (50-200  $\mu$ M) for a duration of 30-120 min, in *E. coli*  
866 cells (CJW4617) grown at 30°C in M9 minimal medium supplemented with glycerol (0.2%), casamino  
867 acids (0.1%) and thiamine (1  $\mu$ g/ml). GFP- $\mu$ NS particles were detected using SpotFinder (Sliusarenko  
868 et al., 2011). Particle positions of both nanocage-GFP and GFP- $\mu$ NS particles relative to the cell  
869 coordinates were calculated using the function projectToMesh in Oufiti and normalized by cell width  
870 and length. The relative particle positions were used to generate histograms to demonstrate the  
871 probability density of relative particle locations inside the cell.

872

### 873 **Estimation of GFP- $\mu$ NS particle sizes**

874 The size estimation of the GFP-  $\mu$ NS particles was performed as previously described (Parry et al.,  
875 2014). This method establishes a relation between the fluorescence intensity ( $I$ ) of GFP- $\mu$ NS particles  
876 and their absolute sizes ( $d$ ). The particle fluorescence intensity ( $I$ ) was calculated by integrating the  
877 volume below the fitting bivariate normal distribution that was used to determine the particle  
878 location:  $I = 2\pi A\sigma_x\sigma_y$ , where  $A$  is the amplitude of the fitting distribution, and  $\sigma_x$ ,  $\sigma_y$  are the  
879 standard deviations of the distribution in X and Y dimensions, respectively. Assuming the total  
880 fluorescence intensity of a particle is proportional to its volume, and the volume is a cubic function  
881 of its size (e.g., for a sphere), we further calculated the cubic root of the fluorescence intensity:  $\sqrt[3]{I}$ .

882

883 The absolute sizes of GFP- $\mu$ NS particles were estimated as previously described (Parry et al., 2014).  
884 Briefly, cells expressing GFP- $\mu$ NS were lysed with T7 phages, resulting in the release of the GFP- $\mu$ NS  
885 particles in solution. Cell debris were removed by centrifugation at 4,000 g. Released GFP- $\mu$ NS  
886 particles were then mixed with fluorescent microspheres of known nominal size (110 nm,

887 FluoSpheres F8803, Invitrogen), and their diffusion coefficients were determined using single  
888 particle tracking microscopy. We defined the fluorescence-derived relative particle size  $d_{\text{rel}} =$   
889  $\sqrt[3]{I/\langle I_{\text{fluo}} \rangle}$  for the GFP- $\mu$ NS particles, where  $\langle I_{\text{fluo}} \rangle$  denotes the average fluorescence intensity of the  
890 fluorescent microspheres. Based on the Stokes-Einstein equation, the relative particle size and the  
891 corresponding diffusion coefficient is inversely proportional:  $D = kT/(3\pi\eta d_{\text{rel}})$ , where  $k$  is the  
892 Boltzmann constant,  $T$  is the absolute temperature, and  $\eta$  is the viscosity of the solution. The absolute  
893 sizes of the GFP- $\mu$ NS particles were estimated as  $d = d_{\text{fluo}} D_{\text{fluo}} \alpha / D$ , where  $d_{\text{fluo}} = 110$  nm and  $\alpha =$   
894  $d/d_{\text{rel}}$  is a calibration constant, which was found to be 685 nm.

895

### 896 **Monte Carlo simulation of chromosome conformation**

897 The entire *E. coli* chromosome (4.6 million base pairs, contour length = 1564  $\mu\text{m}$ ) was modeled as a  
898 chain of 26,066 segments, each of which has a length of 60 nm (to reflect the assumed Kuhn length).  
899 To achieve the experimentally determined average DNA concentration within the nucleoid region,  
900 we confined the entire chromosome within a spherocylindrical space with a volume (0.70  $\mu\text{m}^3$ ) equal  
901 to the experimentally observed average nucleoid volume in B-period cells. In an ideal solvent where  
902 the net interaction between the polymer and the solvent is neutral, there is no preference for a  
903 segment on the polymer to interact more or less with other segments. In the simulation, at the end of  
904 each step, a next-step segment was uniformly sampled from a spherical surface, the center and radius  
905 of which are the end of the current step and the assumed Kuhn length, respectively. For a polymer in  
906 a poor or good solvent, the segments on the polymer chain ‘prefer’ interacting among themselves  
907 (poor solvent) or with the solvent (good solvent). To model the inter-segmental attraction and  
908 repulsion, instead of sampling the next-step segments uniformly anywhere on the spherical surface,  
909 restrictions were applied on the range of inclination and azimuth of the spherical surface from which  
910 next-step segments (i.e., angles between the consecutive segments) could be sampled. By verifying  
911 the power-law scaling between the number of segments and the radius of gyration of the simulated  
912 chromosomes, the inter-segmental angles were constrained within empirically determined ranges  
913 (Figure S3C). Specifically, we found that the Flory exponents (0.36 and 0.58) could be achieved when  
914 the inter-segmental angles were constrained to be greater than  $11\pi/18$  and smaller than  $\pi/2$ ,  
915 respectively.

916

917 Similarly, in order to compare the degree of chromosome compaction as a result of different types of  
918 solvent, the *E. coli* chromosome was simulated in free space 1,000 times for each type of the solvent.

919 The radius of gyration of each simulated chromosome was calculated as  $R_g^2 = \frac{1}{N} \sum_i^N (r_i - r_{\text{mean}})^2$ ,

920 where  $R_g$  is the radius of gyration,  $r_i$  is position of  $i$ -th segment,  $r_{\text{mean}}$  is the average position of all  
921 segments and  $N$  is the total number of segments. To account for the circular geometry of the *E. coli*  
922 chromosome, the resulted  $R_g$  was divided by a factor of  $\sqrt{2}$  to get  $R'_g$ . The volume of the simulated  
923 nucleoid in each type of solvent was calculated as  $V = \frac{4}{3}\pi(R'_g)^3$ .

924

### 925 **Construction of distance maps for simulated DNA segments**

926 The simulated chromosomes were binned by approximately 10 kb (56 DNA segments), and the  
927 average positions of the segments within each bin were calculated. The binning was applied to reduce  
928 the computational complexity of calculating the pair distance between DNA segments by more than  
929 three orders of magnitude. A matrix of pair distances, where the  $i$ -th row and  $j$ -th column represent  
930 the Euclidean distance between the  $i$ -th and  $j$ -th bins, was constructed for every simulated  
931 chromosome. A chosen number (10 or 100) of such matrices were averaged together to generate  
932 distance maps representing the average pair distances between the binned segments, which were  
933 then visualized as images in which the individual pixels correspond to the distances.

934

### 935 **Preparation of the cryo-EM grids**

936 *E. coli* wild type cells (MG1655) were grown at 37°C in M9 minimal medium supplemented with  
937 glucose (0.2%), casamino acids (1%) and thiamine (1 µg/ml). Nutrient-rich growth conditions were  
938 chosen over nutrient-poor condition to increase the intracellular concentration of ribosomes (Dai et  
939 al., 2016; Forchhammer and Lindahl, 1971; Phillips et al., 1969; Varricchio and Monier, 1971) thereby  
940 decreasing the likelihood that any observed heterogeneity in ribosome distribution in the cell is due  
941 to random clustering. Cells were then harvested and concentrated between 30- and 150-fold by  
942 centrifugation (6,000 g for 5 min). The concentrated culture sample was deposited onto freshly glow-  
943 discharged holey carbon grids (Quantifoil). The grids were then blotted with the filter paper for ~3-  
944 5 s before getting plunge-frozen into liquid ethane, using a custom gravity-driven plunger apparatus  
945 described previously (Liu et al., 2009; Zhao et al., 2013).

946

### 947 **Cryo-FIB milling**

948 The plunge-frozen grids were clipped into cryo-FIB AutoGrids and mounted into the specimen  
949 shuttle under liquid nitrogen. An Aquilos cryo-FIB system (Thermo Fisher Scientific) was used to mill  
950 the samples to produce thin lamellae. The samples were first sputter-coated with Pt (1 kV, 15 mA, 15  
951 s) to improve the overall sample conductivity, and then were deposited by an organometallic Pt layer

952 (4-5  $\mu\text{m}$  thick) using the gas injection system for the sample protection. Lamellae were produced  
953 using the gallium ion beam at 30 kV with stage tilt angle around  $17^\circ$ . The ion beam current was  
954 reduced according to the lamella thickness ( $t$ ) during the milling process: 0.5 nA for  $t \geq 3 \mu\text{m}$ , 0.3 nA  
955 for  $t \geq 1 \mu\text{m}$ , 0.1 nA for  $t \geq 700 \text{ nm}$ , 0.05/0.03 nA for final polishing. Afterwards, a thin Pt layer was  
956 sputter-coated (1 kV, 10 mA, 5 s) on the lamella to prevent possible charging issue during the cryo-  
957 ET imaging.

958

### 959 **Cryo-ET data acquisition and tomogram reconstruction**

960 The cryo-FIB lamellae were transferred to a 300 kV Titan Krios electron microscope (Thermo Fisher  
961 Scientific) equipped with a Direct Electron Detector and energy filter (Gatan). The program SerialEM  
962 (Mastronarde, 2005) was used to collect single-axis tilt series around  $-6 \mu\text{m}$  defocus, with a  
963 cumulative dose of  $\sim 100 \text{ e}^-/\text{\AA}$  covering angles from  $-60^\circ$  to  $60^\circ$  ( $2^\circ$  tilt step). Images were acquired  
964 at  $26,000\times$  magnification with an effective pixel size of  $5.457 \text{ \AA}$  at the specimen level. All recorded  
965 images were first drift corrected by the software MotionCor2 (Zheng et al., 2017) and then stacked  
966 by the software package IMOD (Kremer et al., 1996). All tilt series were then aligned by IMOD with  
967 the patching tracking method. The program Gctf (Zhang, 2016) was used to determine the defocus of  
968 each tilt image in the aligned stacks, and the function “ctfphaseflip” in IMOD was used to perform the  
969 contrast transfer function (CTF) correction for the tilt images. Tomograms were then reconstructed  
970 in IMOD using the CTF-corrected and aligned stacks.

971

### 972 **Ribosome localization in the cryo-ET tomograms**

973 The software package emClarity (Himes and Zhang, 2018) was used to perform the 3D template  
974 search to identify ribosomes from the tomograms. A low-pass filtered ( $\sim 4\text{-nm}$  resolution) *E. coli* 70S  
975 ribosome structure (Fu et al., 2019) was used as a reference for the template search (Figure S4C).  
976 Initially, up to 15,000-20,000 sub-volumes were initially selected from each tomogram.  
977 Subsequently, the 3D classification and alignment were applied to all sub-volumes by the software  
978 package i3 (Winkler, 2007; Winkler et al., 2009) with no binning. Sub-volumes of the particles in the  
979 false class were removed (Figure S4D). After that, for every pair of localized structures, the  
980 separation distance between their center mass was calculated. Two structures in a pair were  
981 considered duplicates, if the distance between their centers of mass was smaller than 20 nm, and the  
982 structure that had a lower cross-correlation score with the global average structure was removed.  
983 This process repeated itself until no duplicate structure was found. The program UCSF ChimeraX  
984 (Goddard et al., 2018) was used for the 3D surface rendering of subtomogram average structure of

985 ribosome. The accuracy of the localization of ribosomes was verified by both visual inspection and  
986 comparison of the average structure obtained from the localized ribosomes to the reference  
987 structure.

988

### 989 **Pixel intensity correlation between the DNA and ribosome fluorescence signals**

990 *E. coli* cells (CJW7020) were grown at 37°C in M9 minimal medium supplemented with glucose  
991 (0.2%), casamino acids (1%) and thiamine (1 µg/ml). The nucleoid was visualized through DAPI  
992 staining. Fluorescence signals from DAPI and L1-msfGFP were acquired. The nucleoid outlines were  
993 constructed using objectDetection in the software package Oufiti (Paintdakhi et al., 2016). In order to  
994 exclusively quantify the pixel intensity correlation *within* the nucleoid region, the nucleoid outlines  
995 were shrunk by 2 pixels from the original boundaries using the built-in MATLAB function polybuffer.  
996 The shrunk nucleoid outlines enclosed, on average, about 30% of the inner most pixels defined by  
997 the original outlines. Image masks were constructed using the shrunk nucleoid outlines, and pixels  
998 from both the DAPI and GFP images were extracted. Correlation scores (Spearman's  $\rho$ ) were then  
999 calculated between the intensities of DAPI and GFP pixels using the built-in MATLAB function corr.

1000

## 1001 **Supplemental video legends**

### 1002 **Video S1. Related to Figure 3. Diffusion of a 25-nm nanocage-GFP particle**

1003 This video shows an example trajectory of nanocage-GFP particle diffusing in the cytoplasm of an *E.*  
1004 *coli* cell (CJW6340). The left panel shows the original GFP fluorescence signal from the particle, and  
1005 the right panel shows the additional annotation based on the single-particle tracking results: the  
1006 particle center was denoted by the red point, and the yellow tail represents a short trajectory  
1007 indicating the particle positions within the last 5 frames.

1008

### 1009 **Video S2. Related to Figure 5. Simulated chromosomes in different types of solvent.**

1010 This video shows a 3D overview of chromosomes simulated in confinement of a spherocylinder with  
1011 a volume equal to that of an average nucleoid ( $\sim 0.7 \mu\text{m}^3$ ). From left to right, the solvent was assumed  
1012 to be poor ( $\nu = 0.36$ ), ideal ( $\nu = 0.50$ ) and good ( $\nu = 0.58$ ). In all three cases, the Kuhn length of the  
1013 DNA was assumed to be 60 nm.

1014

### 1015 **Video S3. Related to Figure 6. Tomogram of the *E. coli* lamella**

1016 This video shows the tomogram of an *E. coli* lamella obtained after the FIB milling. The lamella had  
1017 an average thickness of 155 nm, and 5,028 ribosomes were detected in it. Based on their

1018 corresponding positions and orientations identified in the analysis, the ribosome structures (colored  
1019 yellow) were placed back into the tomogram for visual inspection. The video shows individual  
1020 tomogram sections along the Z-axis.

1021

1022 **Video S4. Related to Figure 6. Comparison between the reference and the average structure of**  
1023 **localized 70S ribosomes**

1024 This video shows a 3D comparison between the low-pass filtered (~3 nm resolution) reference  
1025 structure (grey) obtained from (Fu et al., 2019) and the average structure (yellow) based on all  
1026 ribosomes localized in the tomogram shown in Figure 6B and Video S3.

1027

1028 **Video S5. Related to Figure 8. Simulated chromosomes in free space in different types of**  
1029 **solvent**

1030 This video shows a 3D overview of chromosomes simulated in free (unbound) space in different  
1031 types of solvent. From top to bottom, the solvent was assumed to be poor ( $\nu = 0.36$ ), ideal ( $\nu = 0.50$ )  
1032 and good ( $\nu = 0.58$ ). In all three cases, the Kuhn length of the DNA was assumed to be 60 nm

1033

1034 **Analysis and simulation code availability**

1035 All code used for analysis in this study can be found at <https://github.com/JacobsWagnerLab>.

1036

1037 **References**

1038 Adicptaningrum, A., Osella, M., Moolman, M.C., Cosentino Lagomarsino, M., and Tans, S.J. (2015).  
1039 Stochasticity and homeostasis in the *E. coli* replication and division cycle. *Sci. Rep.* 5, 18261.

1040 Alatossava, T., Jütte, H., Kuhn, A., and Kellenberger, E. (1985). Manipulation of intracellular  
1041 magnesium content in polymyxin B nonapeptide-sensitized *Escherichia coli* by ionophore  
1042 A23187. *J. Bacteriol.* 162, 413-419.

1043 Auge, S., Schmit, P.O., Crutchfield, C.A., Islam, M.T., Harris, D.J., Durand, E., Clemancey, M., Quoineaud,  
1044 A.A., Lancelin, J.M., Prigent, Y., *et al.* (2009). NMR measure of translational diffusion and fractal  
1045 dimension. Application to molecular mass measurement. *J. Phys. Chem. B* 113, 1914-1918.

1046 Axpe, E., Chan, D., Offeddu, G.S., Chang, Y., Merida, D., Hernandez, H.L., and Appel, E.A. (2019). A  
1047 multiscale model for solute diffusion in hydrogels. *Macromolecules* 52, 6889-6897.

1048 Azam, T.A., Hiraga, S., and Ishihama, A. (2000). Two types of localization of the DNA-binding proteins  
1049 within the *Escherichia coli* nucleoid. *Genes Cells* 5, 613-626.

1050 Bakshi, S., Choi, H., Mondal, J., and Weisshaar, J.C. (2014). Time-dependent effects of transcription-  
1051 and translation-halting drugs on the spatial distributions of the *Escherichia coli* chromosome and  
1052 ribosomes. *Mol. Microbiol.* 94, 871-887.



- 1053 Bakshi, S., Siryaporn, A., Goulian, M., and Weisshaar, J.C. (2012). Superresolution imaging of  
1054 ribosomes and RNA polymerase in live *Escherichia coli* cells. *Mol. Microbiol.* *85*, 21-38.
- 1055 Basan, M., Zhu, M., Dai, X., Warren, M., Sévin, D., Wang, Y.P., and Hwa, T. (2015). Inflating bacterial  
1056 cells by increased protein synthesis. *Mol. Syst. Biol.* *11*, 836.
- 1057 Baumann, C.G., Smith, S.B., Bloomfield, V.A., and Bustamante, C. (1997). Ionic effects on the elasticity  
1058 of single DNA molecules. *Proc. Natl. Acad. Sci. USA* *94*, 6185-6190.
- 1059 Bernstein, J.A., Khodursky, A.B., Lin, P.H., Lin-Chao, S., and Cohen, S.N. (2002). Global analysis of  
1060 mRNA decay and abundance in *Escherichia coli* at single-gene resolution using two-color  
1061 fluorescent DNA microarrays. *Proc. Natl. Acad. Sci. USA* *99*, 9697-9702.
- 1062 Blattner, F.R., Plunkett, G., 3rd, Bloch, C.A., Perna, N.T., Burland, V., Riley, M., Collado-Vides, J., Glasner,  
1063 J.D., Rode, C.K., Mayhew, G.F., *et al.* (1997). The complete genome sequence of *Escherichia coli* K-  
1064 12. *Science* *277*, 1453-1462.
- 1065 Bloomfield, V.A. (1997). DNA condensation by multivalent cations. *Biopolymers* *44*, 269-282.
- 1066 Borochoy, N., Eisenberg, H., and Kam, Z. (1981). Dependence of DNA conformation on the  
1067 concentration of salt. *Biopolymers* *20*, 231-235.
- 1068 Boublik, M. (1985). Structure of the *Escherichia coli* ribosome. *Molecular cytology of Escherichia coli*,  
1069 N. Nanninga, ed. (Academic Press).
- 1070 Brangwynne, C.P., Koenderink, G.H., MacKintosh, F.C., and Weitz, D.A. (2009). Intracellular transport  
1071 by active diffusion. *Trends Cell Biol.* *19*, 423-427.
- 1072 Bremer, H., and Dennis, P.P. (2008). Modulation of chemical composition and other parameters of the  
1073 cell at different exponential growth rates. *EcoSal Plus* *3*.
- 1074 Brendler, T., Abeles, A., and Austin, S. (1995). A protein that binds to the P1 origin core and the oriC  
1075 13mer region in a methylation-specific fashion is the product of the host seqA gene. *EMBO Journal*  
1076 *14*, 4083-4089.
- 1077 Broering, T.J., Arnold, M.M., Miller, C.L., Hurt, J.A., Joyce, P.L., and Nibert, M.L. (2005). Carboxyl-  
1078 proximal regions of reovirus nonstructural protein  $\mu$ NS necessary and sufficient for forming  
1079 factory-like inclusions. *J. Virol.* *79*, 6194.
- 1080 Broering, T.J., Parker, J.S.L., Joyce, P.L., Kim, J., and Nibert, M.L. (2002). Mammalian reovirus  
1081 nonstructural protein  $\mu$ NS forms large inclusions and colocalizes with reovirus microtubule-  
1082 associated protein  $\mu$ 2 in transfected cells. *J. Virol.* *76*, 8285.
- 1083 Cabrera, J.E., Cagliero, C., Quan, S., Squires, C.L., and Jin, D.J. (2009). Active transcription of rRNA  
1084 operons condenses the nucleoid in *Escherichia coli*: examining the effect of transcription on  
1085 nucleoid structure in the absence of transertion. *J. Bacteriol.* *191*, 4180-4185.
- 1086 Cabrera, J.E., and Jin, D.J. (2003). The distribution of RNA polymerase in *Escherichia coli* is dynamic  
1087 and sensitive to environmental cues. *Mol. Microbiol.* *50*, 1493-1505.
- 1088 Cai, L.H., Panyukov, S., and Rubinstein, M. (2011). Mobility of nonsticky nanoparticles in polymer  
1089 liquids. *Macromolecules* *44*, 7853-7863.
- 1090 Carn, F., Boué, F., Djabourov, M., Steunou, N., Coradin, T., Livage, J., Floquet, S., Cadot, E., and Buhler,  
1091 E. (2012). Biopolymer folding driven nanoparticle reorganization in bio-nanocomposites. *Soft*  
1092 *Matter* *8*, 2930-2944.
- 1093 Casassa, E.F. (1965). Some statistical properties of flexible ring polymers. *J. Polym. Sci. A Gen. Pap.* *3*,  
1094 605-614.

- 1095 Cayley, S., Lewis, B.A., Guttman, H.J., and Record, M.T. (1991). Characterization of the cytoplasm of  
1096 *Escherichia coli* K-12 as a function of external osmolarity: implications for protein-DNA  
1097 interactions in vivo. *J. Mol. Biol.* *222*, 281-300.
- 1098 Chen, H., Shiroguchi, K., Ge, H., and Xie, X.S. (2015). Genome-wide study of mRNA degradation and  
1099 transcript elongation in *Escherichia coli*. *Mol. Syst. Biol.* *11*, 781.
- 1100 Chowdhury, C., Sinha, S., Chun, S., Yeates, T.O., and Bobik, T.A. (2014). Diverse bacterial  
1101 microcompartment organelles. *Microbiol. Mol. Biol. Rev.* *78*, 438-468.
- 1102 Cooper, E.C., Johnson, P., and Donald, A.M. (1991). Probe diffusion in polymer solutions in the  
1103 dilute/semi-dilute crossover regime: 1. Poly(ethylene oxide). *Polymer* *32*, 2815-2822.
- 1104 Cooper, S., and Helmstetter, C.E. (1968). Chromosome replication and the division cycle of *Escherichia*  
1105 *coli* B/r. *J. Mol. Biol.* *31*, 519-540.
- 1106 Crocker, J.C., and Grier, D.G. (1996). Methods of digital video microscopy for colloidal studies. *J.*  
1107 *Colloid Interface Sci.* *179*, 298-310.
- 1108 Cunha, S., Woldringh, C.L., and Odijk, T. (2001). Polymer-mediated compaction and internal dynamics  
1109 of isolated *Escherichia coli* nucleoids. *J. Struct. Biol.* *136*, 53-66.
- 1110 Dai, X., Zhu, M., Warren, M., Balakrishnan, R., Patsalo, V., Okano, H., Williamson, J.R., Fredrick, K., Wang,  
1111 Y.P., and Hwa, T. (2016). Reduction of translating ribosomes enables *Escherichia coli* to maintain  
1112 elongation rates during slow growth. *Nat. Microbiol.* *2*, 16231.
- 1113 Dame, R.T. (2005). The role of nucleoid-associated proteins in the organization and compaction of  
1114 bacterial chromatin. *Mol. Microbiol.* *56*, 858-870.
- 1115 Dame, R.T., Rashid, F.M., and Grainger, D.C. (2020). Chromosome organization in bacteria:  
1116 mechanistic insights into genome structure and function. *Nat. Rev. Genet.* *21*, 227-242.
- 1117 Dasgupta, B.R., Tee, S.-Y., Crocker, J.C., Frisken, B.J., and Weitz, D.A. (2002). Microrheology of  
1118 polyethylene oxide using diffusing wave spectroscopy and single scattering. *Phys. Rev. E* *65*,  
1119 051505.
- 1120 de Vries, R. (2010). DNA condensation in bacteria: interplay between macromolecular crowding and  
1121 nucleoid proteins. *Biochimie* *92*, 1715-1721.
- 1122 Deana, A., and Belasco, J.G. (2005). Lost in translation: the influence of ribosomes on bacterial mRNA  
1123 decay. *Genes Dev.* *19*, 2526-2533.
- 1124 Diekmann, S., Hillen, W., Morgeneyer, B., Wells, R.D., and Pörschke, D. (1982). Orientation relaxation  
1125 of DNA restriction fragments and the internal mobility of the double helix. *Biophys. Chem.* *15*,  
1126 263-270-270.
- 1127 Dillon, S.C., and Dorman, C.J. (2010). Bacterial nucleoid-associated proteins, nucleoid structure and  
1128 gene expression. *Nat. Rev. Microbiol.* *8*, 185-195.
- 1129 Dorman, C.J. (2019). DNA supercoiling and transcription in bacteria: a two-way street. *BMC Mol. Cell*  
1130 *Biol.* *20*, 26.
- 1131 Dreyfus, M. (2009). Chapter 11 killer and protective ribosomes. *Progress in Molecular Biology and*  
1132 *Translational Science* (Academic Press), pp. 423-466.
- 1133 Dworsky, P., and Schaechter, M. (1973). Effect of rifampin on the structure and membrane  
1134 attachment of the nucleoid of *Escherichia coli*. *J. Bacteriol.* *116*, 1364-1374.

- 1135 Flyamer, I.M., Gassler, J., Imakaev, M., Brandao, H.B., Ulianov, S.V., Abdennur, N., Razin, S.V., Mirny,  
1136 L.A., and Tachibana-Konwalski, K. (2017). Single-nucleus Hi-C reveals unique chromatin  
1137 reorganization at oocyte-to-zygote transition. *Nature* *544*, 110-114.
- 1138 Forchhammer, J., and Lindahl, L. (1971). Growth rate of polypeptide chains as a function of the cell  
1139 growth rate in a mutant of *Escherichia coli* 15. *J. Mol. Biol.* *55*, 563-568.
- 1140 Fu, Z., Indrisiunaite, G., Kaledhonkar, S., Shah, B., Sun, M., Chen, B., Grassucci, R.A., Ehrenberg, M., and  
1141 Frank, J. (2019). The structural basis for release-factor activation during translation termination  
1142 revealed by time-resolved cryogenic electron microscopy. *Nat. Commun.* *10*, 2579.
- 1143 Gennes, P.-G.d. (1979). *Scaling concepts in polymer physics* (Cornell University Press).
- 1144 Goddard, T.D., Huang, C.C., Meng, E.C., Pettersen, E.F., Couch, G.S., Morris, J.H., and Ferrin, T.E. (2018).  
1145 UCSF ChimeraX: meeting modern challenges in visualization and analysis. *Protein Sci.* *27*, 14-25.
- 1146 Gray, W.T., Govers, S.K., Xiang, Y., Parry, B.R., Campos, M., Kim, S., and Jacobs-Wagner, C. (2019).  
1147 Nucleoid size scaling and intracellular organization of translation across bacteria. *Cell* *177*, 1632-  
1148 1648.e1620.
- 1149 Guettari, M., Gomati, R., and Gharbi, A. (2012). Determination of the Flory exponent by study of steady  
1150 shear viscosity. *J. Macromol. Sci. B* *51*, 153-163.
- 1151 Guo, M., Ehrlicher, A.J., Jensen, M.H., Renz, M., Moore, J.R., Goldman, R.D., Lippincott-Schwartz, J.,  
1152 Mackintosh, F.C., and Weitz, D.A. (2014). Probing the stochastic, motor-driven properties of the  
1153 cytoplasm using force spectrum microscopy. *Cell* *158*, 822-832.
- 1154 Hammel, M., Amlanjyoti, D., Reyes, F.E., Chen, J.H., Parpana, R., Tang, H.Y., Larabell, C.A., Tainer, J.A.,  
1155 and Adhya, S. (2016). HU multimerization shift controls nucleoid compaction. *Sci. Adv.* *2*,  
1156 e1600650.
- 1157 Haran, G. (2012). How, when and why proteins collapse: the relation to folding. *Curr. Opin. Struct.*  
1158 *Biol.* *22*, 14-20.
- 1159 Helgesen, E., Fossum-Raunehaug, S., Sætre, F., Schink, K.O., and Skarstad, K. (2015). Dynamic  
1160 *Escherichia coli* SeqA complexes organize the newly replicated DNA at a considerable distance  
1161 from the replisome. *Nucleic Acids Res.* *43*, 2730-2743.
- 1162 Henry, J.T., and Crosson, S. (2013). Chromosome replication and segregation govern the biogenesis  
1163 and inheritance of inorganic polyphosphate granules. *Mol. Biol. Cell* *24*, 3177-3186.
- 1164 Himes, B.A., and Zhang, P. (2018). emClarity: software for high-resolution cryo-electron tomography  
1165 and subtomogram averaging. *Nat. Methods* *15*, 955-961.
- 1166 Hobot, J.A., Villiger, W., Escaig, J., Maeder, M., Ryter, A., and Kellenberger, E. (1985). Shape and fine  
1167 structure of nucleoids observed on sections of ultrarapidly frozen and cryosubstituted bacteria.  
1168 *J. Bacteriol.* *162*, 960-971.
- 1169 Holmes, V.F., and Cozzarelli, N.R. (2000). Closing the ring: links between SMC proteins and  
1170 chromosome partitioning, condensation, and supercoiling. *Proc. Natl. Acad. Sci. USA* *97*, 1322-  
1171 1324.
- 1172 Hsia, Y., Bale, J.B., Gonen, S., Shi, D., Sheffler, W., Fong, K.K., Nattermann, U., Xu, C., Huang, P.S.,  
1173 Ravichandran, R., *et al.* (2016). Design of a hyperstable 60-subunit protein dodecahedron.  
1174 [corrected]. *Nature* *535*, 136-139.

- 1175 Jensen, K.F. (1993). The *Escherichia coli* K-12 "wild types" W3110 and MG1655 have an rph  
1176 frameshift mutation that leads to pyrimidine starvation due to low pyrE expression levels. J.  
1177 Bacteriol. *175*, 3401-3407.
- 1178 Jeon, C., Jung, Y., and Ha, B.-Y. (2017). A ring-polymer model shows how macromolecular crowding  
1179 controls chromosome-arm organization in *Escherichia coli*. Sci. Rep. *7*, 11896-11896.
- 1180 Joyeux, M. (2014). Equilibration of complexes of DNA and H-NS proteins on charged surfaces: A  
1181 coarse-grained model point of view. J. Chem. Phys. *141*, 115102.
- 1182 Jun, S. (2015). Chromosome, cell cycle, and entropy. Biophys. J. *108*, 785-786.
- 1183 Kam, Z., Borochoy, N., and Eisenberg, H. (1981). Dependence of laser light scattering of DNA on NaCl  
1184 concentration. Biopolymers *20*, 2671-2690.
- 1185 Kavenoff, R., and Bowen, B.C. (1976). Electron microscopy of membrane-free folded chromosomes  
1186 from *Escherichia coli*. Chromosoma *59*, 89-101.
- 1187 Kavenoff, R., and Ryder, O.A. (1976). Electron microscopy of membrane-associated folded  
1188 chromosomes of *Escherichia coli*. Chromosoma *55*, 13-25.
- 1189 Kellenberger, E., Ryter, A., and Sechaud, J. (1958). Electron microscope study of DNA-containing  
1190 plasmids. II. vegetative and mature phage DNA as compared with normal bacterial nucleoids in  
1191 different physiological states. J. Biophys. Biochem. Cytol. *4*, 671-678.
- 1192 Kramers, H.A. (1946). The behavior of macromolecules in inhomogeneous flow. J. Chem. Phys. *14*,  
1193 415-424.
- 1194 Kremer, J.R., Mastrorade, D.N., and McIntosh, J.R. (1996). Computer visualization of three-  
1195 dimensional image data using IMOD. J. Struct. Biol. *116*, 71-76.
- 1196 Kuhn, A., and Kellenberger, E. (1985). Productive phage infection in *Escherichia coli* with reduced  
1197 internal levels of the major cations. J. Bacteriol. *163*, 906-912.
- 1198 Le Gall, A., Cattoni, D.I., Guilhas, B., Mathieu-Demazière, C., Oudjedi, L., Fiche, J.-B., Rech, J.,  
1199 Abrahamsson, S., Murray, H., Bouet, J.-Y., *et al.* (2016). Bacterial partition complexes segregate  
1200 within the volume of the nucleoid. Nat. Commun. *7*, 12107-12107.
- 1201 Le, T.B., Imakaev, M.V., Mirny, L.A., and Laub, M.T. (2013). High-resolution mapping of the spatial  
1202 organization of a bacterial chromosome. Science *342*, 731-734.
- 1203 Le, T.B., and Laub, M.T. (2016). Transcription rate and transcript length drive formation of  
1204 chromosomal interaction domain boundaries. EMBO J. *35*, 1582-1595.
- 1205 Lee, C.K., Araki, N., Sowersby, D.S., and Lewis, L.K. (2012). Factors affecting chemical-based  
1206 purification of DNA from *Saccharomyces cerevisiae*. Yeast *29*, 73-80.
- 1207 Lewis, P.J., Thaker, S.D., and Errington, J. (2000). Compartmentalization of transcription and  
1208 translation in *Bacillus subtilis*. EMBO J. *19*, 710-718.
- 1209 Libby, E.A., Roggiani, M., and Goulian, M. (2012). Membrane protein expression triggers chromosomal  
1210 locus repositioning in bacteria. Proc. Natl. Acad. Sci. USA *109*, 7445-7450.
- 1211 Lioy, V.S., Cournac, A., Marbouty, M., Duigou, S., Mozziconacci, J., Espeli, O., Bocard, F., and Koszul, R.  
1212 (2018). Multiscale structuring of the *E. coli* chromosome by nucleoid-associated and condensin  
1213 proteins. Cell *172*, 771-783.e718.

- 1214 Liu, J., Lin, T., Botkin, D.J., McCrum, E., Winkler, H., and Norris, S.J. (2009). Intact flagellar motor of  
1215 *Borrelia burgdorferi* revealed by cryo-electron tomography: evidence for stator ring curvature  
1216 and rotor/C-ring assembly flexion. *J. Bacteriol.* *191*, 5026-5036.
- 1217 Lopez, P.J., Marchand, I., Yarchuk, O., and Dreyfus, M. (1998). Translation inhibitors stabilize  
1218 *Escherichia coli* mRNAs independently of ribosome protection. *Proc. Natl. Acad. Sci. USA* *95*, 6067-  
1219 6072.
- 1220 Lu, M., Campbell, J.L., Boye, E., and Kleckner, N. (1994). SeqA: A negative modulator of replication  
1221 initiation in *E. coli*. *Cell* *77*, 413-426.
- 1222 Lusk, J.E., Williams, R.J.P., and Kennedy, E.P. (1968). Magnesium and the growth of *Escherichia coli*. *J.*  
1223 *Biol. Chem.* *243*, 2618-2624.
- 1224 Ma, J., and Wang, M.D. (2016). DNA supercoiling during transcription. *Biophys. Rev.* *8*, 75-87.
- 1225 Macvanin, M., Edgar, R., Cui, F., Trostel, A., Zhurkin, V., and Adhya, S. (2012). Noncoding RNAs binding  
1226 to the nucleoid protein HU in *Escherichia coli*. *J. Bacteriol.* *194*, 6046-6055.
- 1227 Mantelli, S., Muller, P., Harlepp, S., and Maaloum, M. (2011). Conformational analysis and estimation  
1228 of the persistence length of DNA using atomic force microscopy in solution. *Soft Matter* *7*, 3412-  
1229 3416.
- 1230 Marbouty, M., Cournac, A., Flot, J.F., Marie-Nelly, H., Mozziconacci, J., and Koszul, R. (2014).  
1231 Metagenomic chromosome conformation capture (meta3C) unveils the diversity of chromosome  
1232 organization in microorganisms. *eLife* *3*, e03318.
- 1233 Marbouty, M., Le Gall, A., Cattoni, D.I., Cournac, A., Koh, A., Fiche, J.B., Mozziconacci, J., Murray, H.,  
1234 Koszul, R., and Nollmann, M. (2015). Condensin- and replication-mediated bacterial chromosome  
1235 folding and origin condensation revealed by Hi-C and super-resolution imaging. *Mol. Cell* *59*, 588-  
1236 602.
- 1237 Mason, D.J., and Powelson, D.M. (1956). Nuclear division as observed in live bacteria by a new  
1238 technique. *J. Bacteriol.* *71*, 474-479.
- 1239 Mastronarde, D.N. (2005). Automated electron microscope tomography using robust prediction of  
1240 specimen movements. *J. Struct. Biol.* *152*, 36-51.
- 1241 Molina, F., and Skarstad, K. (2004). Replication fork and SeqA focus distributions in *Escherichia coli*  
1242 suggest a replication hyperstructure dependent on nucleotide metabolism. *Mol. Microbiol.* *52*,  
1243 1597-1612.
- 1244 Moncany, M.L.J., and Kellenberger, E. (1981). High magnesium content of *Escherichia coli* B.  
1245 *Experientia* *37*, 846-847.
- 1246 Mutch, K.J., van Duijneveldt, J.S., and Eastoe, J. (2007). Colloid-polymer mixtures in the protein limit.  
1247 *Soft Matter* *3*, 155-167.
- 1248 Nagano, T., Lubling, Y., Stevens, T.J., Schoenfelder, S., Yaffe, E., Dean, W., Laue, E.D., Tanay, A., and  
1249 Fraser, P. (2013). Single-cell Hi-C reveals cell-to-cell variability in chromosome structure. *Nature*  
1250 *502*, 59-64.
- 1251 Nagano, T., Lubling, Y., Varnai, C., Dudley, C., Leung, W., Baran, Y., Mendelson Cohen, N., Wingett, S.,  
1252 Fraser, P., and Tanay, A. (2017). Cell-cycle dynamics of chromosomal organization at single-cell  
1253 resolution. *Nature* *547*, 61-67.
- 1254 Nicolai, T., and Mandel, M. (1989). The ionic strength dependence of the second virial coefficient of  
1255 low molar mass DNA fragments in aqueous solutions. *Macromolecules* *22*, 438-444.

- 1256 Odijk, T. (1998). Osmotic compaction of supercoiled DNA into a bacterial nucleoid. *Biophys. Chem.*  
1257 *73*, 23-29.
- 1258 Paintdakhi, A., Parry, B., Campos, M., Irnov, I., Elf, J., Surovtsev, I., and Jacobs-Wagner, C. (2016). Oufiti:  
1259 an integrated software package for high-accuracy, high-throughput quantitative microscopy  
1260 analysis. *Mol. Microbiol.* *99*, 767-777.
- 1261 Parry, B.R., Surovtsev, I.V., Cabeen, M.T., O'Hern, C.S., Dufresne, E.R., and Jacobs-Wagner, C. (2014).  
1262 The bacterial cytoplasm has glass-like properties and is fluidized by metabolic activity. *Cell* *156*,  
1263 183-194.
- 1264 Pato, M.L., Bennett, P.M., and Von Meyenburg, K. (1973). Messenger ribonucleic acid synthesis and  
1265 degradation in *Escherichia coli* during inhibition of translation. *J. Bacteriol.* *116*, 710-718.
- 1266 Peale, F.V., Jr., Ishibe, Y., Klinge, C.M., Zain, S., Hilf, R., and Bambara, R.A. (1989). Rapid purification of  
1267 the estrogen receptor by sequence-specific DNA affinity chromatography. *Biochemistry* *28*, 8671-  
1268 8675.
- 1269 Pelletier, J., Halvorsen, K., Ha, B.Y., Paparcone, R., Sandler, S.J., Woldringh, C.L., Wong, W.P., and Jun, S.  
1270 (2012). Physical manipulation of the *Escherichia coli* chromosome reveals its soft nature. *Proc.*  
1271 *Natl. Acad. Sci. USA* *109*, E2649-2656.
- 1272 Pettijohn, D.E., and Hecht, R. (1974). RNA molecules bound to the folded bacterial genome stabilize  
1273 DNA folds and segregate domains of supercoiling. *Cold Spring Harb. Symp. Quant. Biol.* *38*, 31-41.
- 1274 Phillips, L.A., Hotham-Iglewski, B., and Franklin, R.M. (1969). Polyribosomes of *Escherichia coli*. II.  
1275 Experiments to determine the in vivo distribution of polysomes, ribosomes and ribosomal  
1276 subunits. *J. Mol. Biol.* *45*, 23-38.
- 1277 Piekarski, G. (1937). Zytologische Untersuchungen an Paratyphusund Coli Bakterien. *Arch Mikrobiol*  
1278 *8*, 428-429.
- 1279 Porschke, D. (1986). Structure and dynamics of double helices in solution: modes of DNA bending. *J.*  
1280 *Biomol. Struct. Dyn.* *4*, 373-389.
- 1281 Porschke, D. (1991). Persistence length and bending dynamics of DNA from electrooptical  
1282 measurements at high salt concentrations. *Biophys. Chem.* *40*, 169-179.
- 1283 Qian, Z., Zhurkin, V.B., and Adhya, S. (2017). DNA-RNA interactions are critical for chromosome  
1284 condensation in *Escherichia coli*. *Proc. Natl. Acad. Sci. USA* *114*, 12225-12230.
- 1285 Qiu, X., Andresen, K., Kwok, L.W., Lamb, J.S., Park, H.Y., and Pollack, L. (2007). Inter-DNA attraction  
1286 mediated by divalent counterions. *Phys. Rev. Lett.* *99*, 038104.
- 1287 Racki, L.R., Tocheva, E.I., Dieterle, M.G., Sullivan, M.C., Jensen, G.J., and Newman, D.K. (2017).  
1288 Polyphosphate granule biogenesis is temporally and functionally tied to cell cycle exit during  
1289 starvation in *Pseudomonas aeruginosa*. *Proc. Natl. Acad. Sci. USA* *114*, E2440-e2449.
- 1290 Ramakrishnan, S., Fuchs, M., Schweizer, K.S., and Zukoski, C.F. (2002). Entropy driven phase  
1291 transitions in colloid-polymer suspensions: tests of depletion theories. *J. Chem. Phys.* *116*, 2201-  
1292 2212.
- 1293 Ramani, V., Deng, X., Qiu, R., Gunderson, K.L., Steemers, F.J., Disteche, C.M., Noble, W.S., Duan, Z., and  
1294 Shendure, J. (2017). Massively multiplex single-cell Hi-C. *Nat. Methods.* *14*, 263-266.
- 1295 Ratilainen, T., Lincoln, P., and Norden, B. (2001). A simple model for gene targeting. *Biophys. J.* *81*,  
1296 2876-2885.

- 1297 Reyes-Lamothe, R., Tran, T., Meas, D., Lee, L., Li, A.M., Sherratt, D.J., and Tolmasky, M.E. (2014). High-  
1298 copy bacterial plasmids diffuse in the nucleoid-free space, replicate stochastically and are  
1299 randomly partitioned at cell division. *Nucleic Acids Res.* *42*, 1042-1051.
- 1300 Robinow, C., and Kellenberger, E. (1994). The bacterial nucleoid revisited. *Microbiol. Rev.* *58*, 211-  
1301 232.
- 1302 Roe, A.J., McLaggan, D., Davidson, I., O'Byrne, C., and Booth, I.R. (1998). Perturbation of anion balance  
1303 during inhibition of growth of *Escherichia coli* by weak acids. *J. Bacteriol.* *180*, 767-772.
- 1304 Rubinstein, M. (2003). *Polymer physics*, R.H. Colby, ed. (Oxford University Press).
- 1305 Sanamrad, A., Persson, F., Lundius, E.G., Fange, D., Gynna, A.H., and Elf, J. (2014). Single-particle  
1306 tracking reveals that free ribosomal subunits are not excluded from the *Escherichia coli* nucleoid.  
1307 *Proc. Natl. Acad. Sci. USA* *111*, 11413-11418.
- 1308 Schneider, E., Blundell, M., and Kennell, D. (1978). Translation and mRNA decay. *Mol. Gen. Genet.* *160*,  
1309 121-129.
- 1310 Schultz, S.G., Wilson, N.L., and Epstein, W. (1962). Cation transport in *Escherichia coli*. II. Intracellular  
1311 chloride concentration. *J. Gen. Physiol.* *46*, 159-166.
- 1312 Selinger, D.W., Saxena, R.M., Cheung, K.J., Church, G.M., and Rosenow, C. (2003). Global RNA half-life  
1313 analysis in *Escherichia coli* reveals positional patterns of transcript degradation. *Genome Res.* *13*,  
1314 216-223.
- 1315 Sharpe, M.E., Hauser, P.M., Sharpe, R.G., and Errington, J. (1998). *Bacillus subtilis* cell cycle as studied  
1316 by fluorescence microscopy: constancy of cell length at initiation of DNA replication and evidence  
1317 for active nucleoid partitioning. *J. Bacteriol.* *180*, 547-555.
- 1318 Shendruk, T.N., Bertrand, M., de Haan, H.W., Harden, J.L., and Slater, G.W. (2015). Simulating the  
1319 entropic collapse of coarse-grained chromosomes. *Biophys. J.* *108*, 810-820.
- 1320 Slater, S., Wold, S., Lu, M., Boye, E., Skarstad, K., and Kleckner, N. (1995). *E. coli* SeqA protein binds  
1321 *oriC* in two different methyl-modulated reactions appropriate to its roles in DNA replication  
1322 initiation and origin sequestration. *Cell* *82*, 927-936.
- 1323 Sliusarenko, O., Heinritz, J., Emonet, T., and Jacobs-Wagner, C. (2011). High-throughput, subpixel  
1324 precision analysis of bacterial morphogenesis and intracellular spatio-temporal dynamics. *Mol.*  
1325 *Microbiol.* *80*, 612-627.
- 1326 Sobel, E.S., and Harpst, J.A. (1991). Effects of Na<sup>+</sup> on the persistence length and excluded volume of  
1327 T7 bacteriophage DNA. *Biopolymers* *31*, 1559-1564.
- 1328 Spahn, C., Endesfelder, U., and Heilemann, M. (2014). Super-resolution imaging of *Escherichia coli*  
1329 nucleoids reveals highly structured and asymmetric segregation during fast growth. *J. Struct. Biol.*  
1330 *185*, 243-249.
- 1331 Spahn, C.K., Glaesmann, M., Grimm, J.B., Ayala, A.X., Lavis, L.D., and Heilemann, M. (2018). A toolbox  
1332 for multiplexed super-resolution imaging of the *E. coli* nucleoid and membrane using novel  
1333 PAINT labels. *Sci. Rep.* *8*, 14768.
- 1334 Spurio, R., Durrenberger, M., Falconi, M., La Teana, A., Pon, C.L., and Gualerzi, C.O. (1992). Lethal  
1335 overproduction of the *Escherichia coli* nucleoid protein H-NS: ultramicroscopic and molecular  
1336 autopsy. *Mol. Gen. Genet.* *231*, 201-211.

- 1337 Stevens, T.J., Lando, D., Basu, S., Atkinson, L.P., Cao, Y., Lee, S.F., Leeb, M., Wohlfahrt, K.J., Boucher, W.,  
1338 O'Shaughnessy-Kirwan, A., *et al.* (2017). 3D structures of individual mammalian genomes studied  
1339 by single-cell Hi-C. *Nature* *544*, 59-64.
- 1340 Stracy, M., Lesterlin, C., Garza de Leon, F., Uphoff, S., Zawadzki, P., and Kapanidis, A.N. (2015). Live-  
1341 cell superresolution microscopy reveals the organization of RNA polymerase in the bacterial  
1342 nucleoid. *Proc. Natl. Acad. Sci. USA* *112*, E4390-4399.
- 1343 Sun, Q., and Margolin, W. (2004). Effects of perturbing nucleoid structure on nucleoid occlusion-  
1344 mediated toporegulation of FtsZ ring assembly. *J. Bacteriol.* *186*, 3951-3959.
- 1345 Surovtsev, I.V., and Jacobs-Wagner, C. (2018). Subcellular organization: a critical feature of bacterial  
1346 cell replication. *Cell* *172*, 1271-1293.
- 1347 Tan, L., Xing, D., Chang, C.H., Li, H., and Xie, X.S. (2018). Three-dimensional genome structures of single  
1348 diploid human cells. *Science* *361*, 924-928.
- 1349 Tan, L., Xing, D., Daley, N., and Xie, X.S. (2019). Three-dimensional genome structures of single  
1350 sensory neurons in mouse visual and olfactory systems. *Nat. Struct. Mol. Biol.* *26*, 297-307.
- 1351 Trun, N.J., and Marko, J.F. (1998). Architecture of a bacterial chromosome. *Asm News* *64*, 276-283.
- 1352 Tseng, Y., Lee, J.S., Kole, T.P., Jiang, I., and Wirtz, D. (2004). Micro-organization and visco-elasticity of  
1353 the interphase nucleus revealed by particle nanotracking. *J. Cell Sci.* *117*, 2159-2167.
- 1354 Val, M.E., Marbouty, M., de Lemos Martins, F., Kennedy, S.P., Kemble, H., Bland, M.J., Possoz, C., Koszul,  
1355 R., Skovgaard, O., and Mazel, D. (2016). A checkpoint control orchestrates the replication of the  
1356 two chromosomes of *Vibrio cholerae*. *Sci. Adv.* *2*, e1501914.
- 1357 van Helvoort, J.M., Kool, J., and Woldringh, C.L. (1996). Chloramphenicol causes fusion of separated  
1358 nucleoids in *Escherichia coli* K-12 cells and filaments. *J. Bacteriol.* *178*, 4289-4293.
- 1359 Varricchio, F., and Monier, R. (1971). Ribosome patterns in *Escherichia coli* growing at various rates.  
1360 *J. Bacteriol.* *108*, 105-110.
- 1361 Verma, S.C., Qian, Z., and Adhya, S.L. (2019). Architecture of the *Escherichia coli* nucleoid. *PLoS Genet.*  
1362 *15*, e1008456-e1008456.
- 1363 Verschoor, A., Frank, J., and Boublik, M. (1985). Investigation of the 50 S ribosomal subunit by  
1364 electron microscopy and image analysis. *J. Ultrastruct. Res.* *92*, 180-189.
- 1365 Waigh, T.A., Ober, R., Williams, C.E., and Galin, J.-C. (2001). Semidilute and concentrated solutions of  
1366 a solvophobic polyelectrolyte in nonaqueous solvents. *Macromolecules* *34*, 1973-1980.
- 1367 Waldminghaus, T., Weigel, C., and Skarstad, K. (2012). Replication fork movement and methylation  
1368 govern SeqA binding to the *Escherichia coli* chromosome. *Nucleic Acids Res.* *40*, 5465-5476.
- 1369 Wallden, M., Fange, D., Lundius, E.G., Baltekin, O., and Elf, J. (2016). The synchronization of replication  
1370 and division cycles in individual *E. coli* cells. *Cell* *166*, 729-739.
- 1371 Wang, X., Brandao, H.B., Le, T.B., Laub, M.T., and Rudner, D.Z. (2017). *Bacillus subtilis* SMC complexes  
1372 juxtapose chromosome arms as they travel from origin to terminus. *Science* *355*, 524-527.
- 1373 Wang, X., Le, T.B., Lajoie, B.R., Dekker, J., Laub, M.T., and Rudner, D.Z. (2015). Condensin promotes the  
1374 juxtaposition of DNA flanking its loading site in *Bacillus subtilis*. *Genes Dev.* *29*, 1661-1675.
- 1375 Wang, Y., Penkul, P., and Milstein, J.N. (2016). Quantitative localization microscopy reveals a novel  
1376 organization of a high-copy number plasmid. *Biophys. J.* *111*, 467-479.



- 1377 Wegner, A.S., Wintraecken, K., Spurio, R., Woldringh, C.L., de Vries, R., and Odijk, T. (2016).  
1378 Compaction of isolated *Escherichia coli* nucleoids: polymer and H-NS protein synergetics. *J. Struct.*  
1379 *Biol.* *194*, 129-137.
- 1380 Winkler, H. (2007). 3D reconstruction and processing of volumetric data in cryo-electron  
1381 tomography. *J. Struct. Biol.* *157*, 126-137.
- 1382 Winkler, H., Zhu, P., Liu, J., Ye, F., Roux, K.H., and Taylor, K.A. (2009). Tomographic subvolume  
1383 alignment and subvolume classification applied to myosin V and SIV envelope spikes. *J. Struct.*  
1384 *Biol.* *165*, 64-77.
- 1385 Winkler, J., Seybert, A., König, L., Pruggnaller, S., Haselmann, U., Sourjik, V., Weiss, M., Frangakis, A.S.,  
1386 Mogk, A., and Bukau, B. (2010). Quantitative and spatio-temporal features of protein aggregation  
1387 in *Escherichia coli* and consequences on protein quality control and cellular ageing. *EMBO J.* *29*,  
1388 910-923.
- 1389 Wong, I.Y., Gardel, M.L., Reichman, D.R., Weeks, E.R., Valentine, M.T., Bausch, A.R., and Weitz, D.A.  
1390 (2004). Anomalous diffusion probes microstructure dynamics of entangled F-actin networks.  
1391 *Phys. Rev. Lett.* *92*, 178101.
- 1392 Wu, F., Swain, P., Kuijpers, L., Zheng, X., Felter, K., Guurink, M., Solari, J., Jun, S., Shimizu, T.S.,  
1393 Chaudhuri, D., *et al.* (2019). Cell boundary confinement sets the size and position of the *E. coli*  
1394 chromosome. *Curr Biol.* *29*, 2131-2144.e4
- 1395 Yang, D., Mannik, J., Retterer, S.T., and Mannik, J. (2020). The effects of polydisperse crowders on the  
1396 compaction of the *Escherichia coli* nucleoid. *Mol. Microbiol.* *113*, 1022-1037
- 1397 Yang, S., Kim, S., Kim, D.K., Jeon An, H., Bae Son, J., Heden Gynna, A., and Ki Lee, N. (2019).  
1398 Transcription and translation contribute to gene locus relocation to the nucleoid periphery in *E.*  
1399 *coli*. *Nat. Commun.* *10*, 5131.
- 1400 Yonemura, K., and Maeda, H. (1982). A new assay method for DNase by fluorescence polarization and  
1401 fluorescence intensity using DNA-ethidium bromide complex as a sensitive substrate. *J. Biochem.*  
1402 *92*, 1297-1303.
- 1403 Yoshikawa, K., Hirota, S., Makita, N., and Yoshikawa, Y. (2010). Compaction of DNA induced by like-  
1404 charge protein: opposite salt-effect against the polymer-salt-induced condensation with neutral  
1405 polymer. *J. Phys. Chem. Lett.* *1*, 1763-1766.
- 1406 Zhang, C., Shao, P.G., van Kan, J.A., and van der Maarel, J.R. (2009). Macromolecular crowding induced  
1407 elongation and compaction of single DNA molecules confined in a nanochannel. *Proc. Natl. Acad.*  
1408 *Sci. USA* *106*, 16651-16656.
- 1409 Zhang, K. (2016). Gctf: Real-time CTF determination and correction. *J. Struct. Biol.* *193*, 1-12.
- 1410 Zhao, X., Zhang, K., Boquoi, T., Hu, B., Motaleb, M.A., Miller, K.A., James, M.E., Charon, N.W., Manson,  
1411 M.D., Norris, S.J., *et al.* (2013). Cryoelectron tomography reveals the sequential assembly of  
1412 bacterial flagella in *Borrelia burgdorferi*. *Proc. Natl. Acad. Sci. USA* *110*, 14390-14395.
- 1413 Zheng, S.Q., Palovcak, E., Armache, J.P., Verba, K.A., Cheng, Y., and Agard, D.A. (2017). MotionCor2:  
1414 anisotropic correction of beam-induced motion for improved cryo-electron microscopy. *Nat.*  
1415 *Methods.* *14*, 331-332.
- 1416 Zhu, J., Penczek, P.A., Schroder, R., and Frank, J. (1997). Three-dimensional reconstruction with  
1417 contrast transfer function correction from energy-filtered cryoelectron micrographs: procedure  
1418 and application to the 70S *Escherichia coli* ribosome. *J. Struct. Biol.* *118*, 197-219.

- 1419 Zimm, B.H., and Stockmayer, W.H. (1949). The dimensions of chain molecules containing branches  
1420 and rings. *J. Chem. Phys.* *17*, 1301-1314.
- 1421 Zimmerman, S.B. (1993). Macromolecular crowding effects on macromolecular interactions: some  
1422 implications for genome structure and function. *Biochim. Biophys. Acta.* *1216*, 175-185.
- 1423 Zimmerman, S.B. (2002). Toroidal nucleoids in *Escherichia coli* exposed to chloramphenicol. *J. Struct.*  
1424 *Biol.* *138*, 199-206.
- 1425 Zimmerman, S.B., and Minton, A.P. (1993). Macromolecular crowding: biochemical, biophysical, and  
1426 physiological consequences. *Annu. Rev. Biophys. Biomol. Struct.* *22*, 27-65.

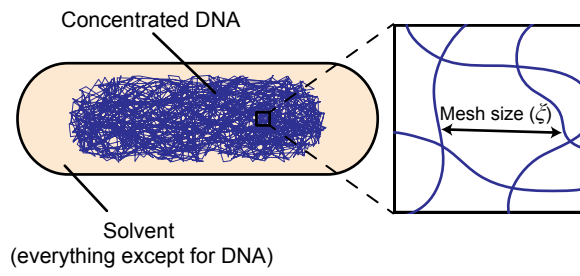

Figure 1

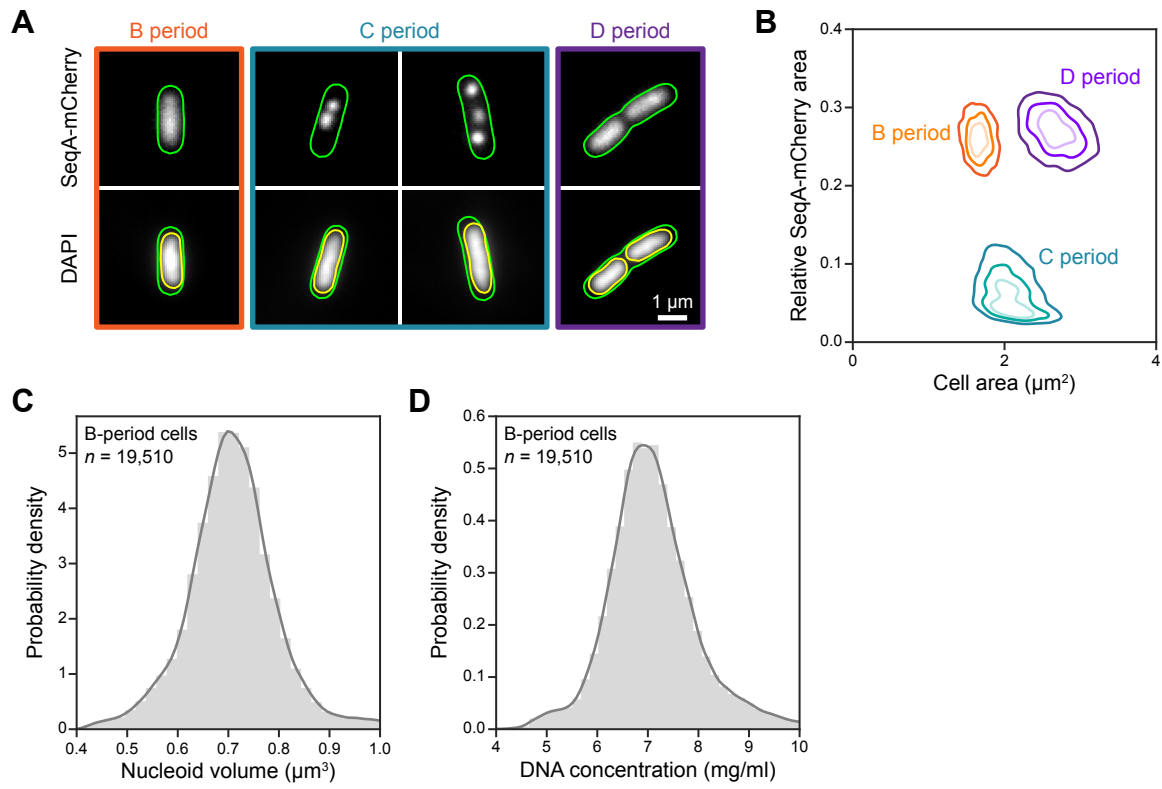

Figure 2

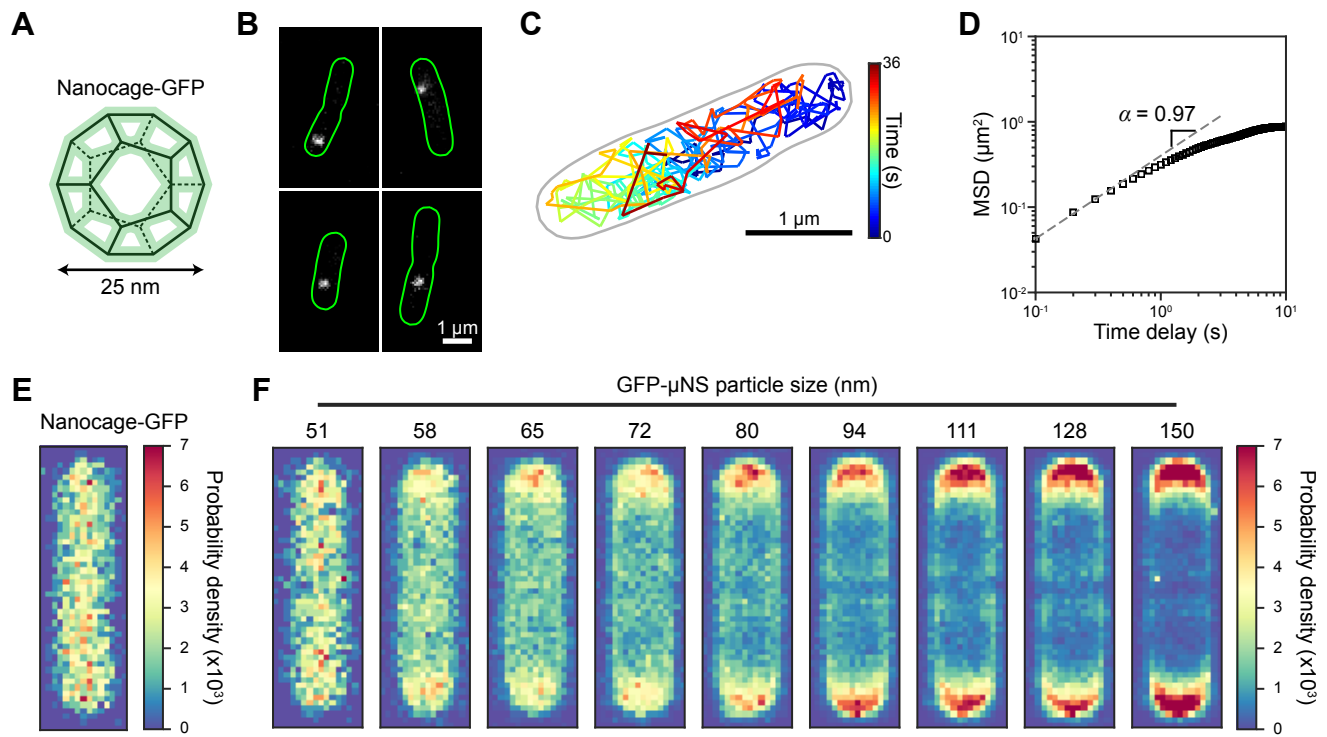

Figure 3

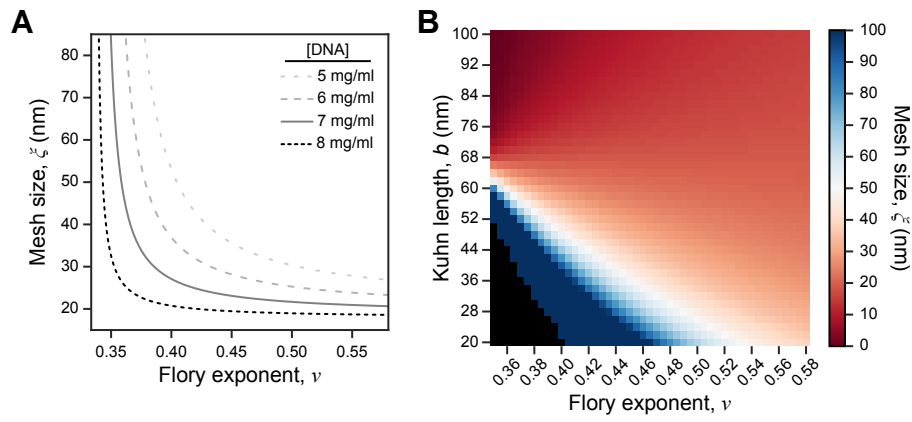

Figure 4

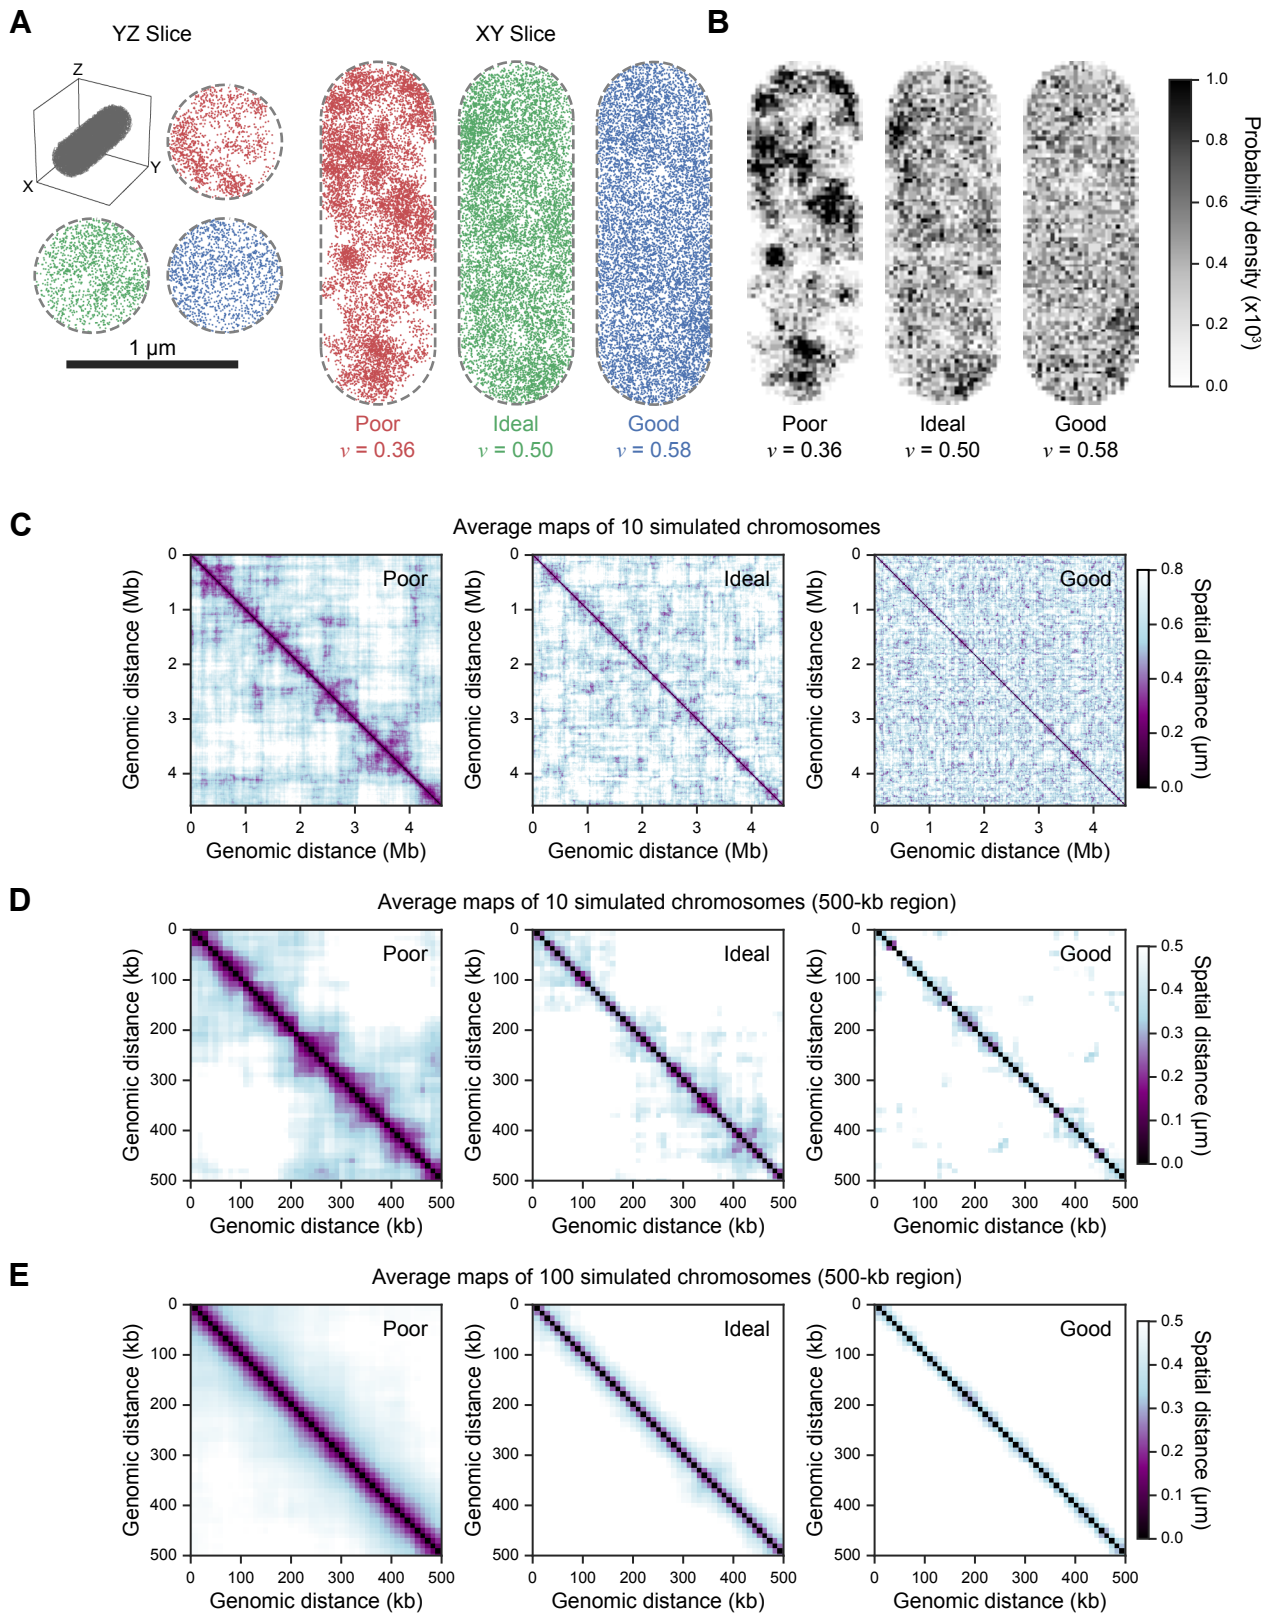

Figure 5

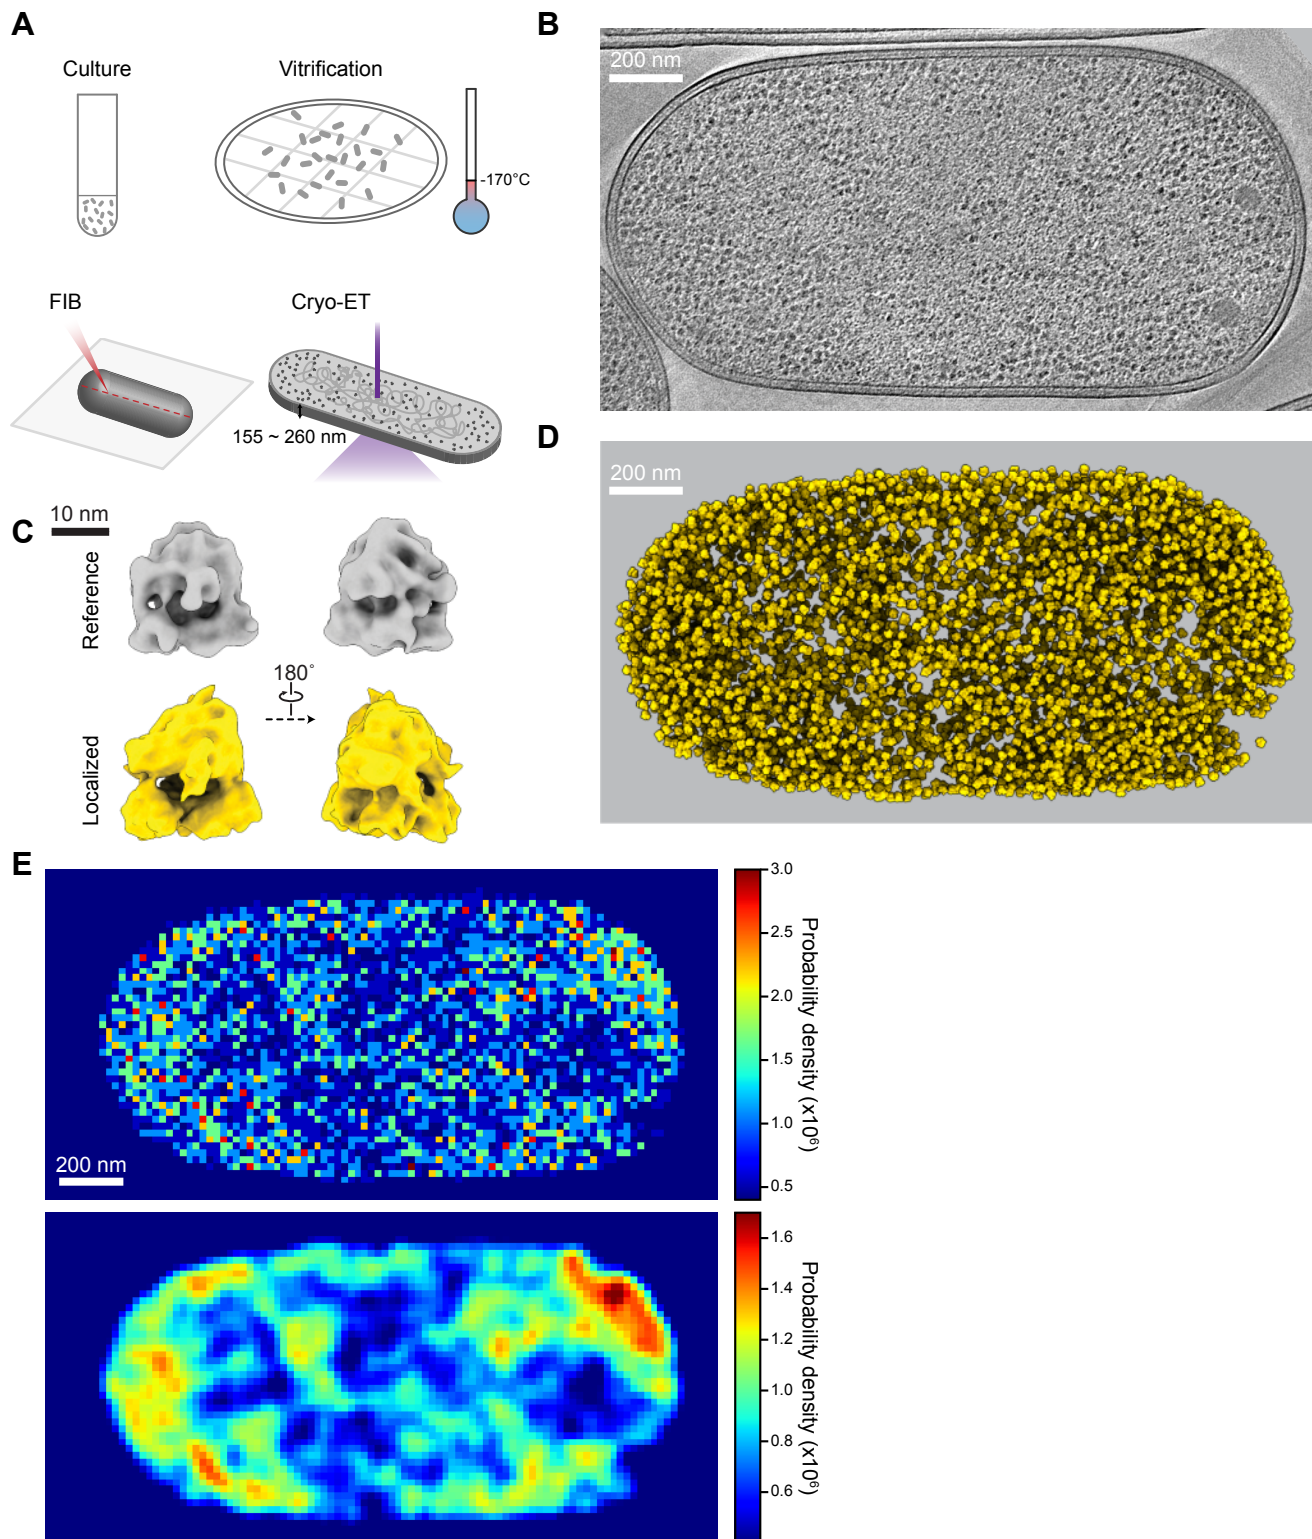

Figure 6



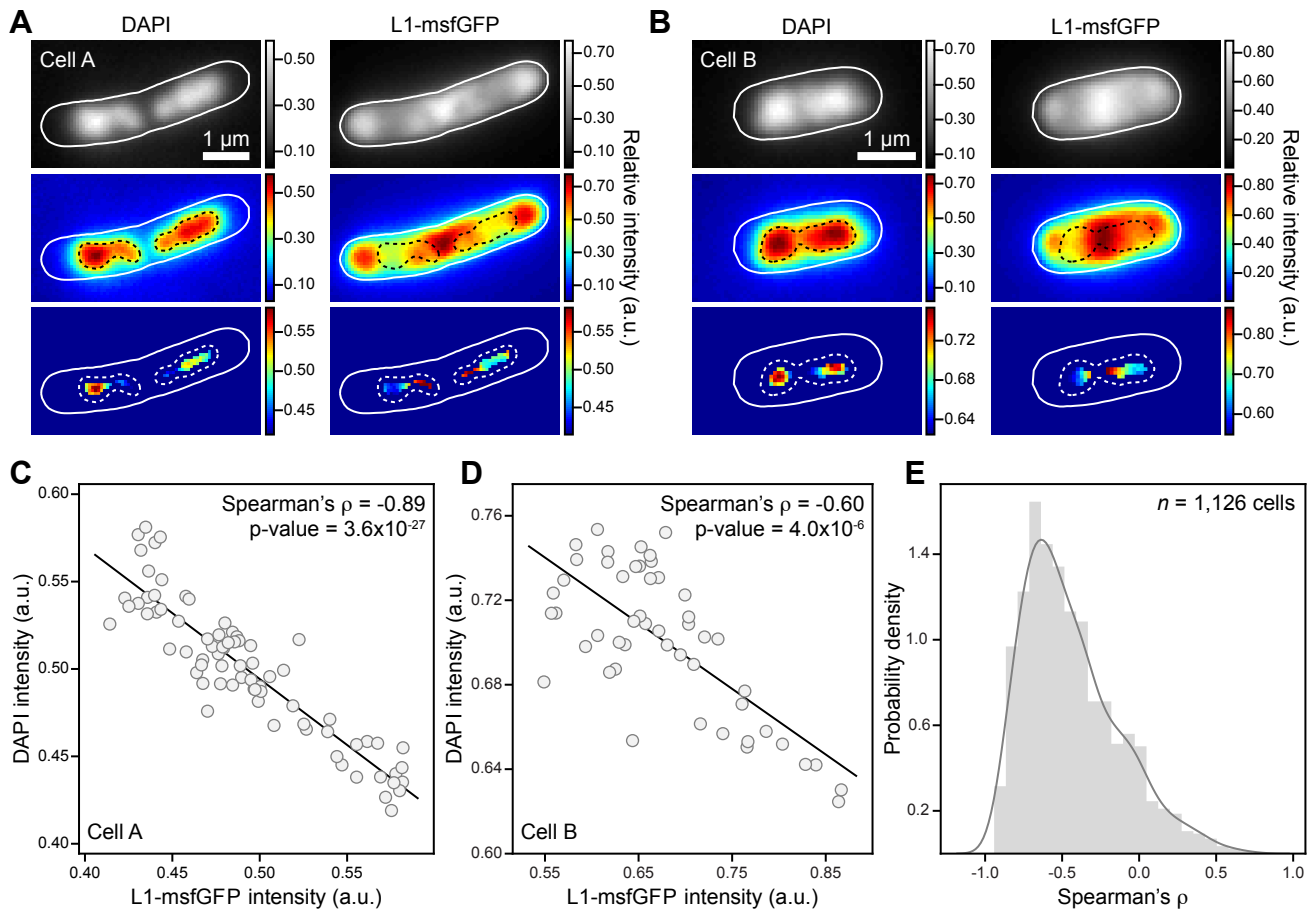

Figure 7

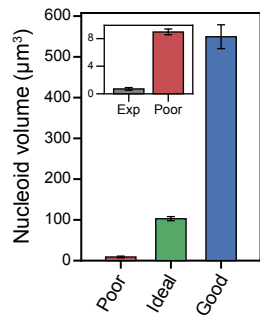

Figure 8

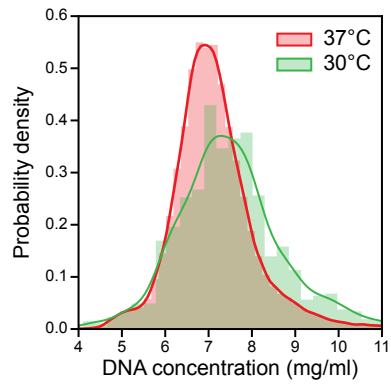

Figure S1

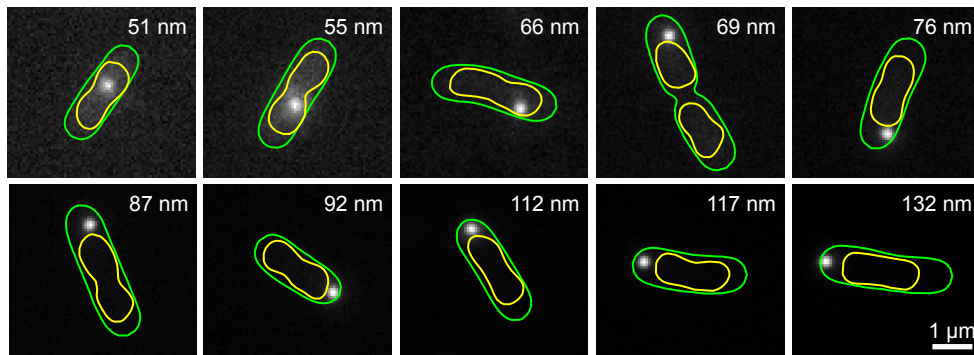

Figure S2

**A**

6 examples of average maps of 10 simulated chromosomes (500-kb region) in a poor solvent

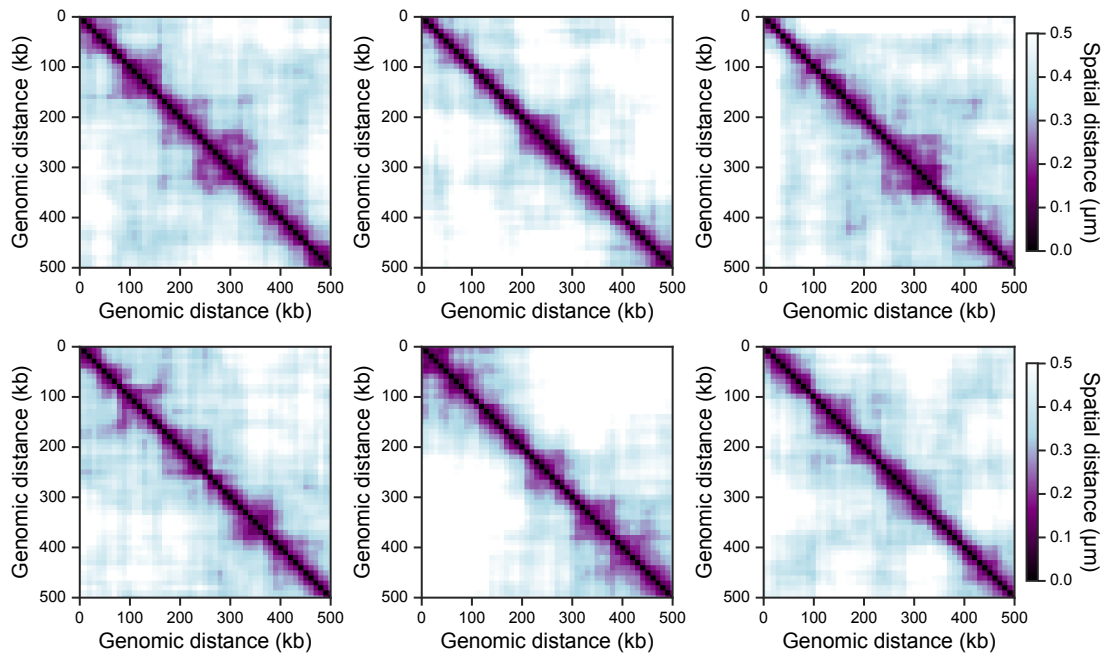

**B**

Average maps of 100 simulated chromosomes

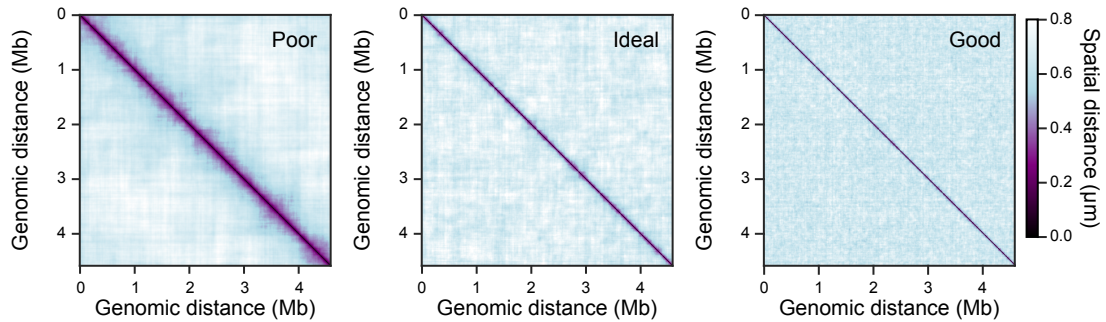

**C**

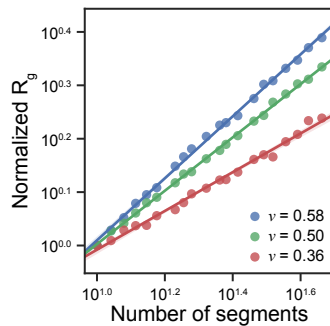

Figure S3

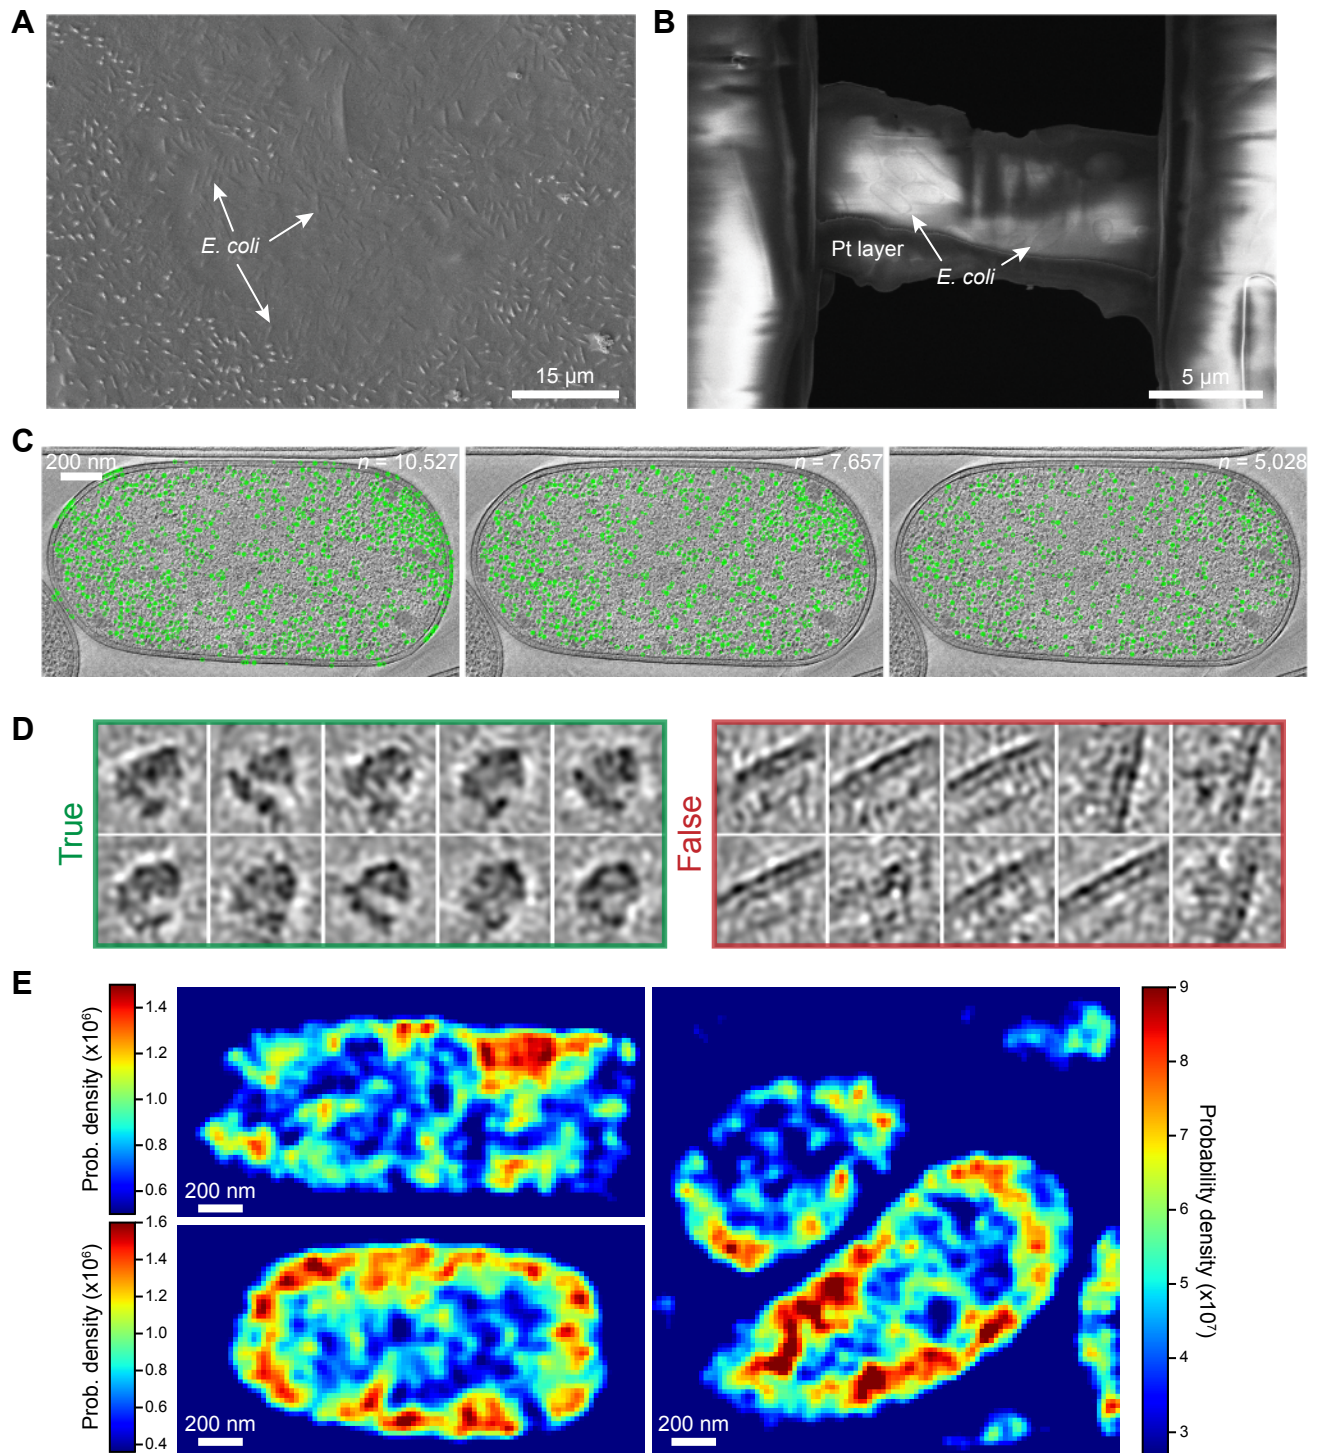

Figure S4
